# Supplementary material for: Structure and bonding properties of the platinum-mediated tetrametallic endohedral fullerene La3Pt@C98
Source: Royal Society of Chemistry journal article supplement (doi:10.1039/d3dt00681f), 2023-01-01
Supplement: d3dt00681f1.pdf [file d3dt00681f1.pdf]

## Supplementary information for

### Structure and Bonding Properties of the Platinum-Mediated Endohedral Tetrametallic Fullerene $\text{La}_3\text{Pt}@C_{98}$

Yameng Hou<sup>a</sup>, Lei Mu<sup>a†</sup>, Sijin Zhou<sup>a</sup>, Yicheng Xu<sup>a</sup>, Xianglei Kong<sup>a,b,c\*</sup>

<sup>a</sup> State Key Laboratory of Elemento-organic Chemistry, College of Chemistry, Nankai University, Tianjin, 300071, China.

<sup>b</sup> Tianjin Key Laboratory of Biosensing and Molecular Recognition, College of Chemistry, Nankai University, Tianjin 300071, China.

<sup>c</sup> Frontiers Science Center for New Organic Matter, College of Chemistry, Nankai University, Tianjin 300071, China.

<sup>†</sup> Present address: COFCO Nutrition and Health Research Institute Co., Ltd., Beijing 102209, China

\*Corresponding author. Email: kongxianglei@nankai.edu.cn

---

**This PDF file includes:**

1. Supplementary Methods
2. Supplementary Figures
3. Supplementary Tables
4. Supplementary Data
5. Supplementary References

---

# 1 Supplementary Methods

## 1.1 Materials

Graphene (Timesnano company), lanthanum (III) chloride (99.5%, Tianjin Guangfu Chemical research institute), platinum (IV) tetrachloride (99%, Energy Chemical company), acetone (99.5%, Concord Tech reagent).

## 1.2 Experimental Methods

Experiments were performed on a 7.0 T FT ICR MS (Varian IonSpec) employing the commercial MALDI source in positive-ion mode. A 355nm Nd: YAG laser (Orion, New Wave) was used to create ions. Typical laser energy was set to be 85% relative to the maximum energy of 4mJ/pulse. Graphene was dispersed in water/acetone (9:1, vol/vol) at 1mg/ml. Lanthanum (III) chloride and platinum (IV) tetrachloride were dissolved in acetone at 5 mM and 1 mM, respectively. Then the solutions of LaCl<sub>3</sub> and PtCl<sub>4</sub> were mixed at the ratio of 1:1 (vol/vol). 1μL of graphene solutions was deposited on the stainless steel-plate and dried at room temperature, then 1μL of the mixture of LaCl<sub>3</sub>/PtCl<sub>4</sub> was deposited on it. In the experiments, ions produced by six consecutive laser pulses were accumulated in the hexapole first. After the accumulation, the hexapole exit lens was gated so that ions could be transferred into the quadrupole guide. The DC potential of the trapping plate near the quadrupole was set to be 15 V before the introduction of the ions into the cell. During the period of ion transfer to the cell, the trapping plate was pulsed down to 0 V to allow the ions to enter the ICR cell. The ions were then cooled down by a pulsed nitrogen gas (with pressure in the cell raised to about 10<sup>-6</sup> Torr) before detection or isolation for tandem MS. Typically, mass spectra were acquired in the *m/z* range of 700–2500.

## 1.3 Theoretical Methods

All DFT calculations were carried out using the Gaussian 09 program package.<sup>77</sup> In general, given a common +3 oxidation state of M (M = Sc, Y, Ln) in EMF of M<sub>2</sub>@C<sub>2n</sub> and M<sub>3</sub>@C<sub>2n</sub><sup>53, 78</sup>, the fullerene cage is in a valence state of -6. In this research, the valence state of platinum is difficult to be estimated at the first time, thus, all top negatively charged cages of C<sub>98</sub><sup>4-</sup>, C<sub>98</sub><sup>6-</sup>, C<sub>98</sub><sup>7-</sup> and C<sub>98</sub><sup>8-</sup> need to be considered. Therefore, 259 IPR-isomers of C<sub>98</sub> cages get from CAGE software<sup>79</sup> were first calculated with valences of -4, -6, -7 and -8 at the xTB level<sup>80</sup>. These structures were then

ranked based on their energies, and the top 15 isomers of negatively charged cages  $C_{98}^{4-}$ ,  $C_{98}^{6-}$ ,  $C_{98}^{7-}$  and  $C_{98}^{8-}$  were chosen and optimized at the level of B3LYP/6-31g(d)<sup>81,82</sup> (**Table. S1-S4**). It is worth noting that  $C_{98}$  empty cages calculated under different valence states (-6, -7, -8) have similar cage stability, so some of their respective top 15 most stable  $C_{98}$  cages ( $C_{98}^{6-}$ ,  $C_{98}^{7-}$  and  $C_{98}^{8-}$ ) are duplicates. Thus, the top five stable IPR isomers of  $C_{98}^{4-}$ , the top eight stable IPR isomers of  $C_{98}^{8-}$  and the top ten stable IPR isomers of  $C_{98}^{6-}$ ,  $C_{98}^{7-}$  were all selected. Besides, the non-IPR cage of 168785 was also considered in this paper, due to its importance in  $Gd_2@C_{98}$  isomers, as shown by Nagase. *et.al.*<sup>31</sup> In total, the nine IPR isomers and one non-IPR isomer are selected here. Then, the  $La_3Pt$  metalloclusters were inserted into the optimized cages. For each cage, initial confirmations formed by insertions from more than 8 different directions were tried. All these isomers were optimized at the B3LYP/6-31g(d)/SDD level. The 6-31G(d) basis set is used for C atom, while SDD basis set is used for La and Pt atoms. Results show that for same carbon cage, there are several conformational isomers that are different in their orientations of the  $La_3Pt$  cluster relative to the cage. The results are shown in **Figures 2, S3** and **S4**. Their electronic energies were calculated with zero-point energy corrections. Two different DFT methods<sup>83</sup> of wB97X-D and TPSSH were applied to these isomers of  $La_3Pt@C_{90}$ , and the results are shown in **Table. S4**.

Relative concentrations ( $W_i$ ) of the  $i$ -th isomer at different temperatures were calculated by:<sup>84</sup>

$$W_i = \frac{q_i \exp(-\frac{DH_{0,i}^o}{RT})}{\sum_{j=1}^n q_j \exp(-\frac{DH_{0,j}^o}{RT})} \dots\dots\dots(1.1)$$

where R is the gas constant, T is the absolute temperature,  $q_i$  and  $DH_{0,i}^o$  are the partition functions and the relative heat of formation at absolute zero temperature of the  $i$ -th isomer, respectively. And rotational-vibrational partition functions were calculated from the optimized structural and vibrational data obtained at the level of B3LYP/6-31g(d)/SDD without frequency scaling.

A series of wavefunction analyses were used to determine the bonding interactions and electronic properties of the  $La_3Pt@C_{98}$  isomers using the Multifwn software.<sup>72</sup> On one hand, the gaussian checkpoint files containing the wavefunction information were imported into Multifwn for ELF analysis, Mayer bonding order calculation, and interaction region indicator (IRI) analysis<sup>85</sup> to verify bonding interactions within these isomers. On the other hand, by combining Multifwn with Visual Molecular Dynamics (VMD)<sup>86</sup>, it is feasible to plot the charge distribution maps, spin electron distribution maps, and molecular orbitals of  $La_3Pt@C2(231010)-C_{98}$  and  $La_3Pt@C1(231005)-C_{98}$ , which can be used to better demonstrate the interesting electronic properties of EMFs. All of the wavefunction analyses presented above were carried out at the level of B3LYP /6-31g(d)/SDD. Herein, both spin electron distribution maps and molecular orbital diagrams are drawn in isosurface maps. The isovalue was set at 0.002.

To elucidate the bonding state, the local molecular orbitals (LMOs) were located using the popular

---

Pipek–Mezey localization method. The obtained LMOs were also verified by the adaptive natural density partitioning (adNDP) method.<sup>73</sup> The selection process is as follows: first, isolate the La<sub>3</sub>Pt clusters; second, perform an orbital search in the order 1c-2e, 2c-2e, 3c-2e, 4c-2e; third, select the representative high occupation number of these orbitals (in each step, not all orbitals can be selected, otherwise, there will be no orbitals available for the next step). For a better rendering, the isovalue of all orbits was set at 0.5.

---

## 2 Supplementary Figures

### Figures. S1–S12

**Figure. S1** Comparison of the experimental isotopic distributions of  $\text{La}_3\text{Pt}@C_{112}^+$  and  $\text{La}_3\text{Pt}@C_{114}^+$  ions with their simulated isotopic distributions.

**Figure. S2** Laser ablation MS spectrum of the mixture of graphene/ $\text{PtCl}_4$  in the regions of 800-1500  $m/z$  (a), 1500-2200  $m/z$  (b) and 2200-2900  $m/z$  (c).

**Figure. S3** Top and front views of optimized geometric structures of  $\text{La}_3\text{Pt}@C_{98}$  isomers:  $\text{La}_3\text{Pt}@C1(230926)-C_{98}$  (a),  $\text{La}_3\text{Pt}@C1(230933)-C_{98}$  (b),  $\text{La}_3\text{Pt}@C2(230932)-C_{98}$  (c),  $\text{La}_3\text{Pt}@C1(230979)-C_{98}$  (d),  $\text{La}_3\text{Pt}@C2(230924)-C_{98}$  (e),  $\text{La}_3\text{Pt}@C2(230922)-C_{98}$  (f).

**Figure. S4** Top and front views of optimized geometric structures of conformational isomers:  $\text{La}_3\text{Pt}@C1(231005)-C_{98}-2$  (a),  $\text{La}_3\text{Pt}@C2(230932)-C_{98}-2$  (b),  $\text{La}_3\text{Pt}@C1(230933)-C_{98}-2$  (c).

**Figure. S5** Mulliken charge distributions of  $\text{La}_3\text{Pt}@C_{98}$  isomers:  $\text{La}_3\text{Pt}@C2(231010)-C_{98}$  (a),  $\text{La}_3\text{Pt}@C1(231005)-C_{98}$  (b),  $\text{La}_3\text{Pt}@C1(230926)-C_{98}$  (c),  $\text{La}_3\text{Pt}@C1(230933)-C_{98}$  (d),  $\text{La}_3\text{Pt}@C2(230932)-C_{98}$  (e),  $\text{La}_3\text{Pt}@C1(230979)-C_{98}$  (f), which were calculated at the level of B3LYP/6-31g(d)/SDD.

**Figure. S6** Electron localization function analysis of  $\text{La}_3\text{Pt}@C_{98}$  isomers:  $\text{La}_3\text{Pt}@C1(231005)-C_{98}$  (a),  $\text{La}_3\text{Pt}@C1(230926)-C_{98}$  (b),  $\text{La}_3\text{Pt}@C1(230933)-C_{98}$  (c) in the  $\text{La}_1\text{-La}_2\text{-La}_3$  (left) and  $\text{La}_1\text{-Pt-La}_2$  (right) planes.

**Figure. S7** Color-coded map of intra-cluster interactions described by the interaction

---

region indicator of  $\text{La}_3\text{Pt}@C_{98}$  isomers: Color-coded map of intra-cluster interactions described by the interaction region indicator of  $\text{La}_3\text{Pt}@C_{98}$  isomers:  $\text{La}_3\text{Pt}@C1(231005)-C_{98}$  (a,b) and  $\text{La}_3\text{Pt}@C1(231005)-C_{98}$  (c,d), from full (a, c,) and half section views (b, d). The standard coloring method applied was shown in the right of the figure.

The standard coloring method applied was shown in the right of the figure.

**Figure. S8** Adaptive natural density partitioning (adNDP) analysis results of  $\text{La}_3\text{Pt}@C1(231005)-C_{98}$ .

**Figure. S9** Electron spin density distributions of  $\text{La}_3\text{Pt}@C_{98}$  isomers:  $\text{La}_3\text{Pt}@C1(230926)-C_{98}$  (a),  $\text{La}_3\text{Pt}@C1(230933)-C_{98}$  (b),  $\text{La}_3\text{Pt}@C2(230932)-C_{98}$  (c),  $\text{La}_3\text{Pt}@C1(230979)-C_{98}$  (d), which were calculated at the level of B3LYP/6-31g(d)/SDD.

**Figure. S10** Main frontier molecular orbitals of  $\text{La}_3\text{Pt}@C1(231005)-C_{98}$ , calculated at the B3LYP/6-31g(d)/SDD level.

**Figure. S11** The comparison of molecular orbitals of  $\text{La}_3\text{Pt}@C2(231010)-C_{98}$  with those of empty  $C_{98}$ .

**Figure. S12** Simulated IR spectra of  $\text{La}_3\text{Pt}@C2(231010)-C_{98}$  (a),  $\text{La}_3\text{Pt}@C1(231005)-C_{98}$  (b),  $\text{La}_3\text{Pt}@C1(230926)-C_{98}$  (c) and  $\text{La}_3\text{Pt}@C1(230933)-C_{98}$  (d), which were calculated at the B3LYP/6-31g(d)/SDD level.

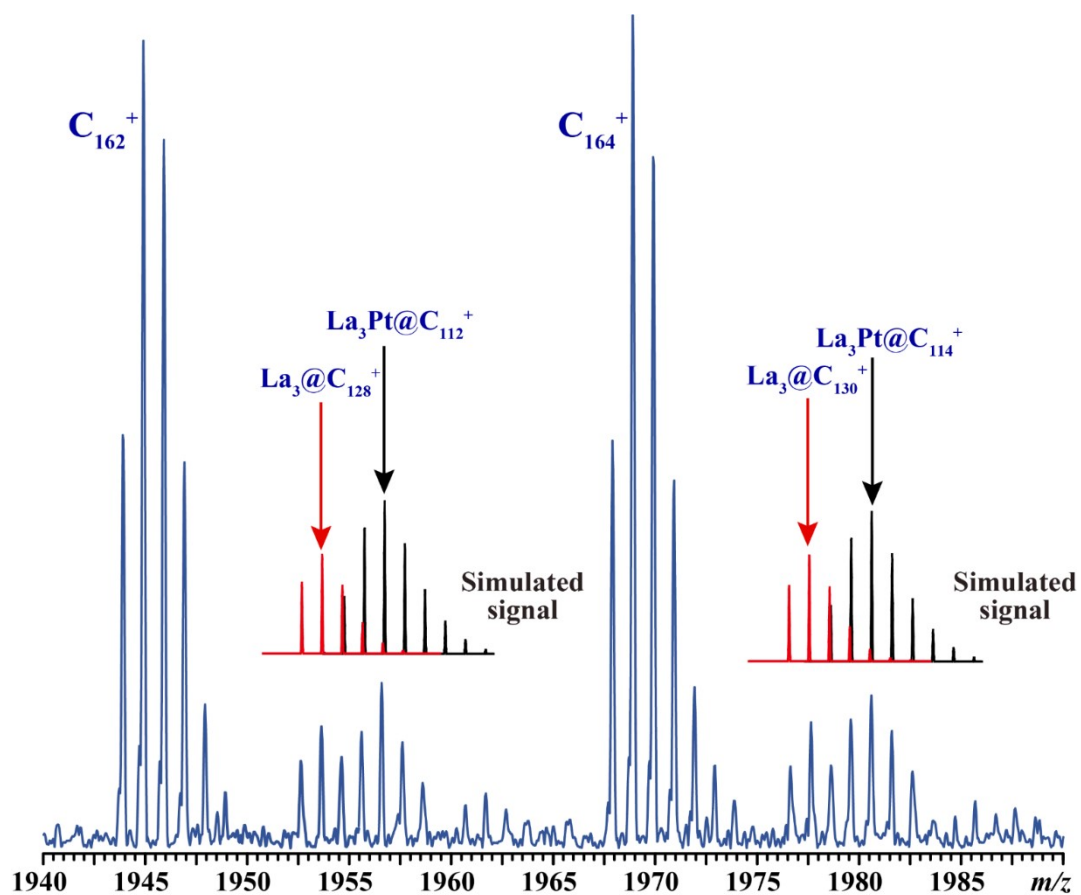

**Figure. S1** Comparison of the experimental isotopic distributions of  $La_3Pt@C_{112}^+$  and  $La_3Pt@C_{114}^+$  ions with their simulated isotopic distributions.



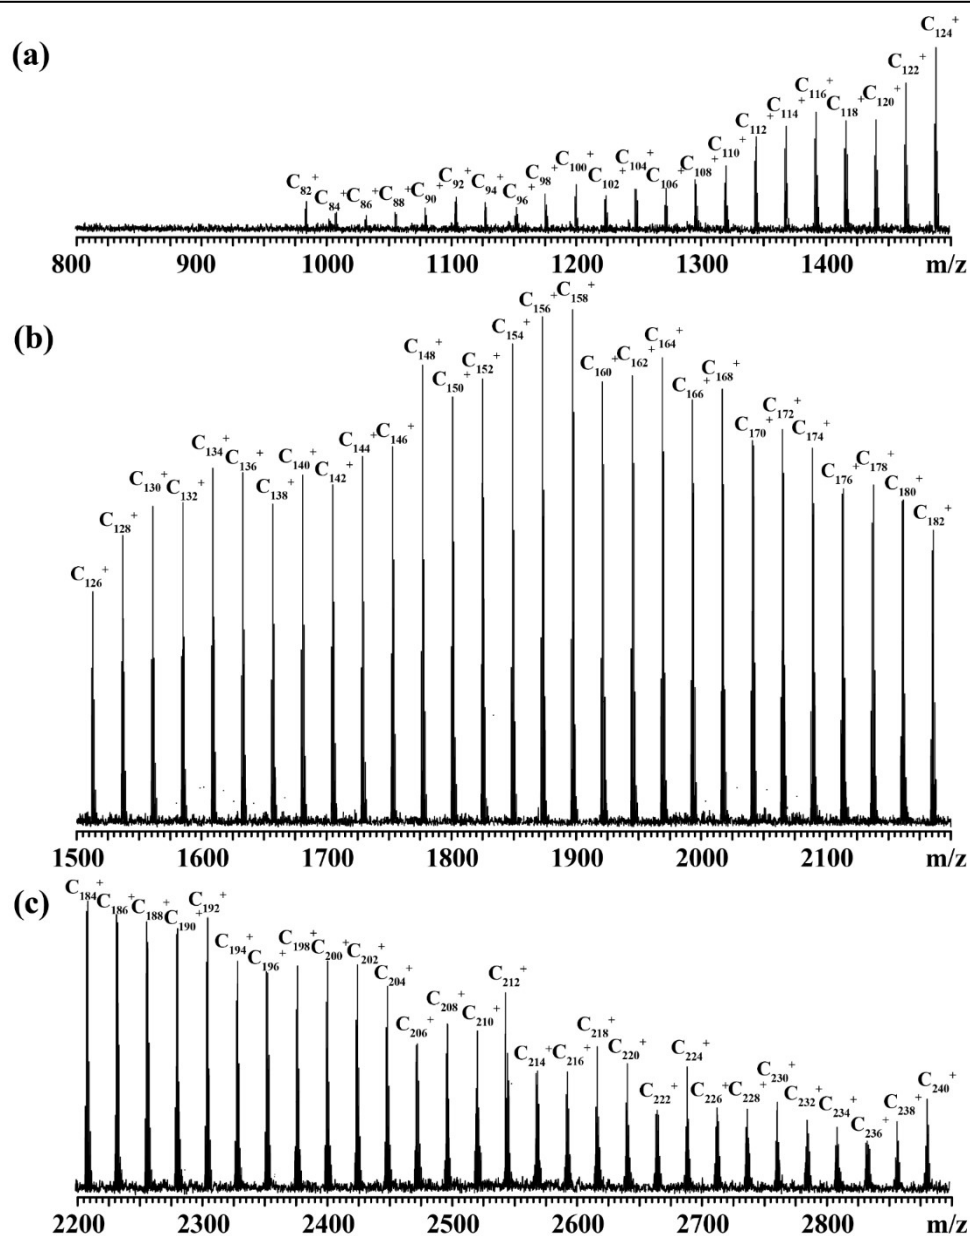

**Figure. S2** Laser ablation MS spectrum of the mixture of graphene/PtCl<sub>4</sub> in the regions of 800-1500  $m/z$  (a), 1500-2200  $m/z$  (b) and 2200-2900  $m/z$  (c).

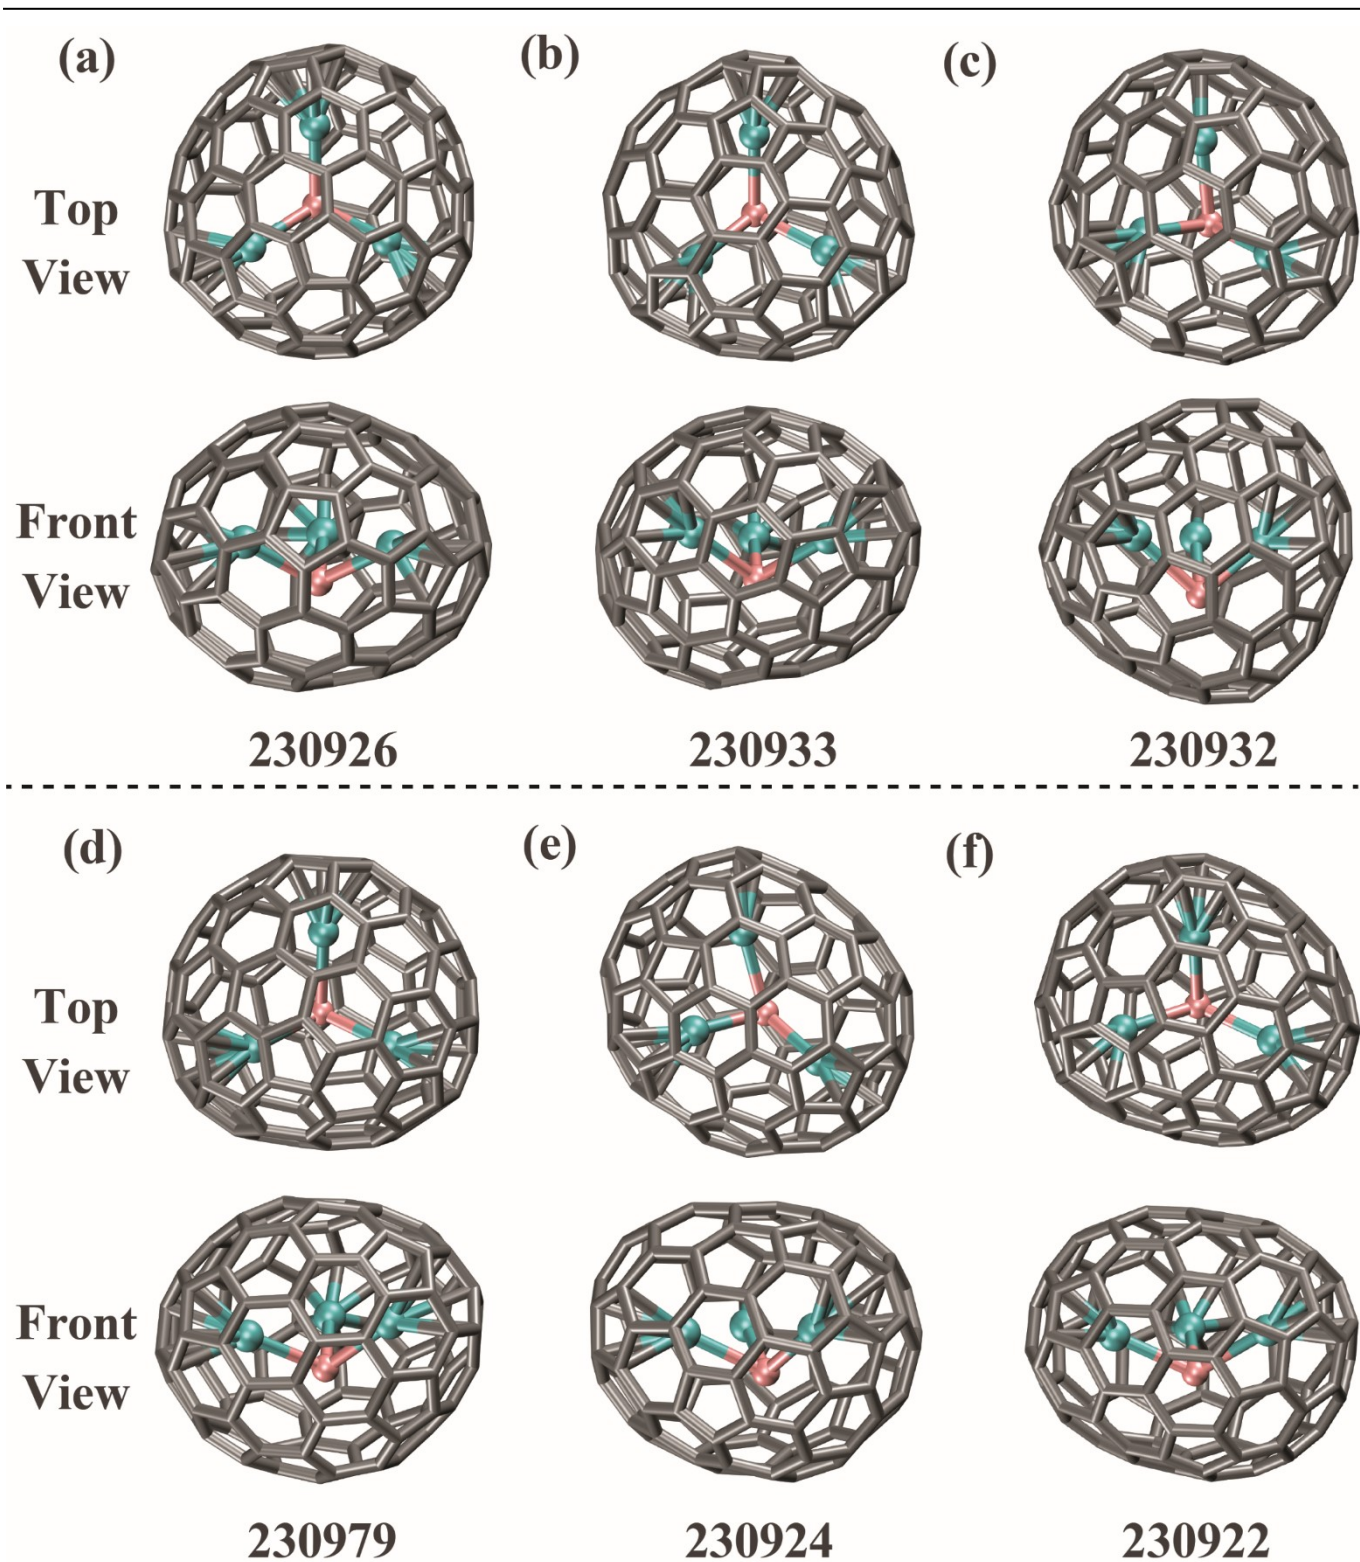

**Figure. S3** Top and front views of optimized geometric structures of  $\text{La}_3\text{Pt}@C_{98}$  isomers:  $\text{La}_3\text{Pt}@C1(230926)-C_{98}$  (a),  $\text{La}_3\text{Pt}@C1(230933)-C_{98}$  (b),  $\text{La}_3\text{Pt}@C2(230932)-C_{98}$  (c),  $\text{La}_3\text{Pt}@C1(230979)-C_{98}$  (d),  $\text{La}_3\text{Pt}@C2(230924)-C_{98}$  (e),  $\text{La}_3\text{Pt}@C2(230922)-C_{98}$  (f).

---

Top View

Front View

231005-2

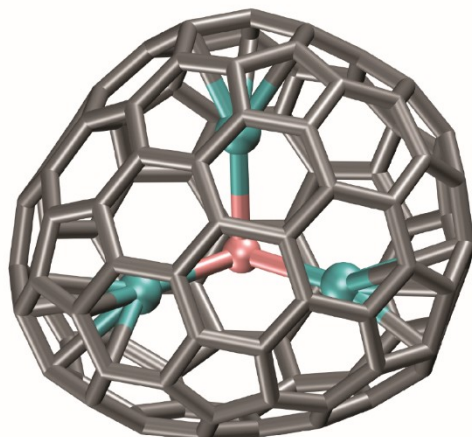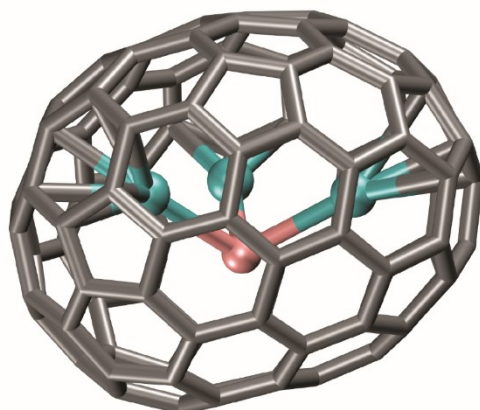

230932-2

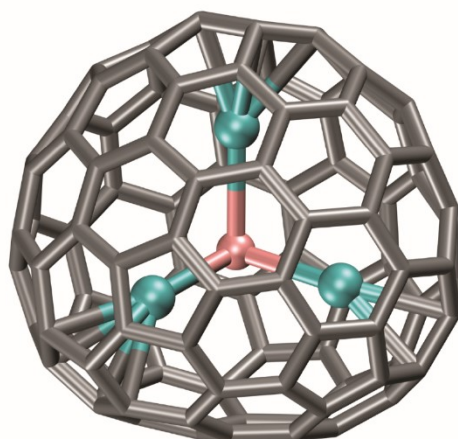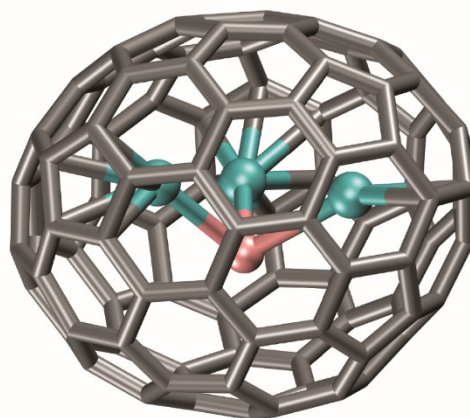

230933-2

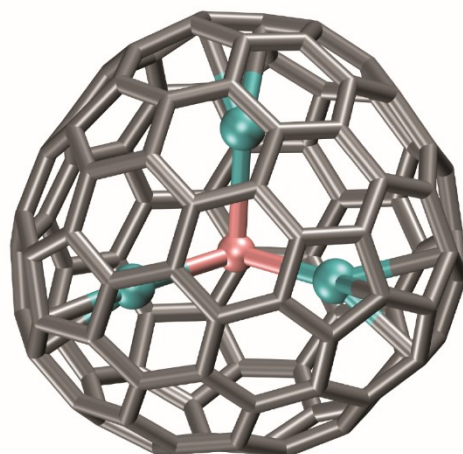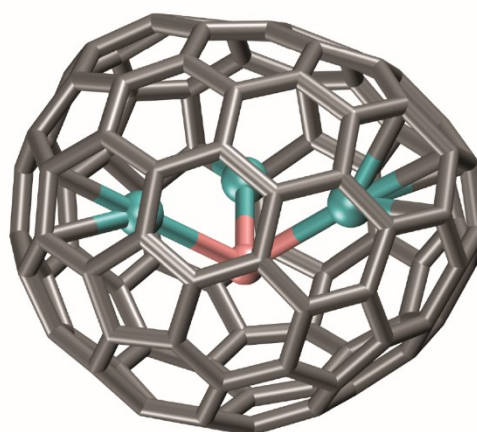

**Figure. S4** Top and front views of optimized geometric structures of conformational isomers: La<sub>3</sub>Pt@CI(231005)-C<sub>98</sub>-2 (a), La<sub>3</sub>Pt@C<sub>2</sub>(230932)-C<sub>98</sub>-2 (b), La<sub>3</sub>Pt@CI(230933)-C<sub>98</sub>-2 (c).



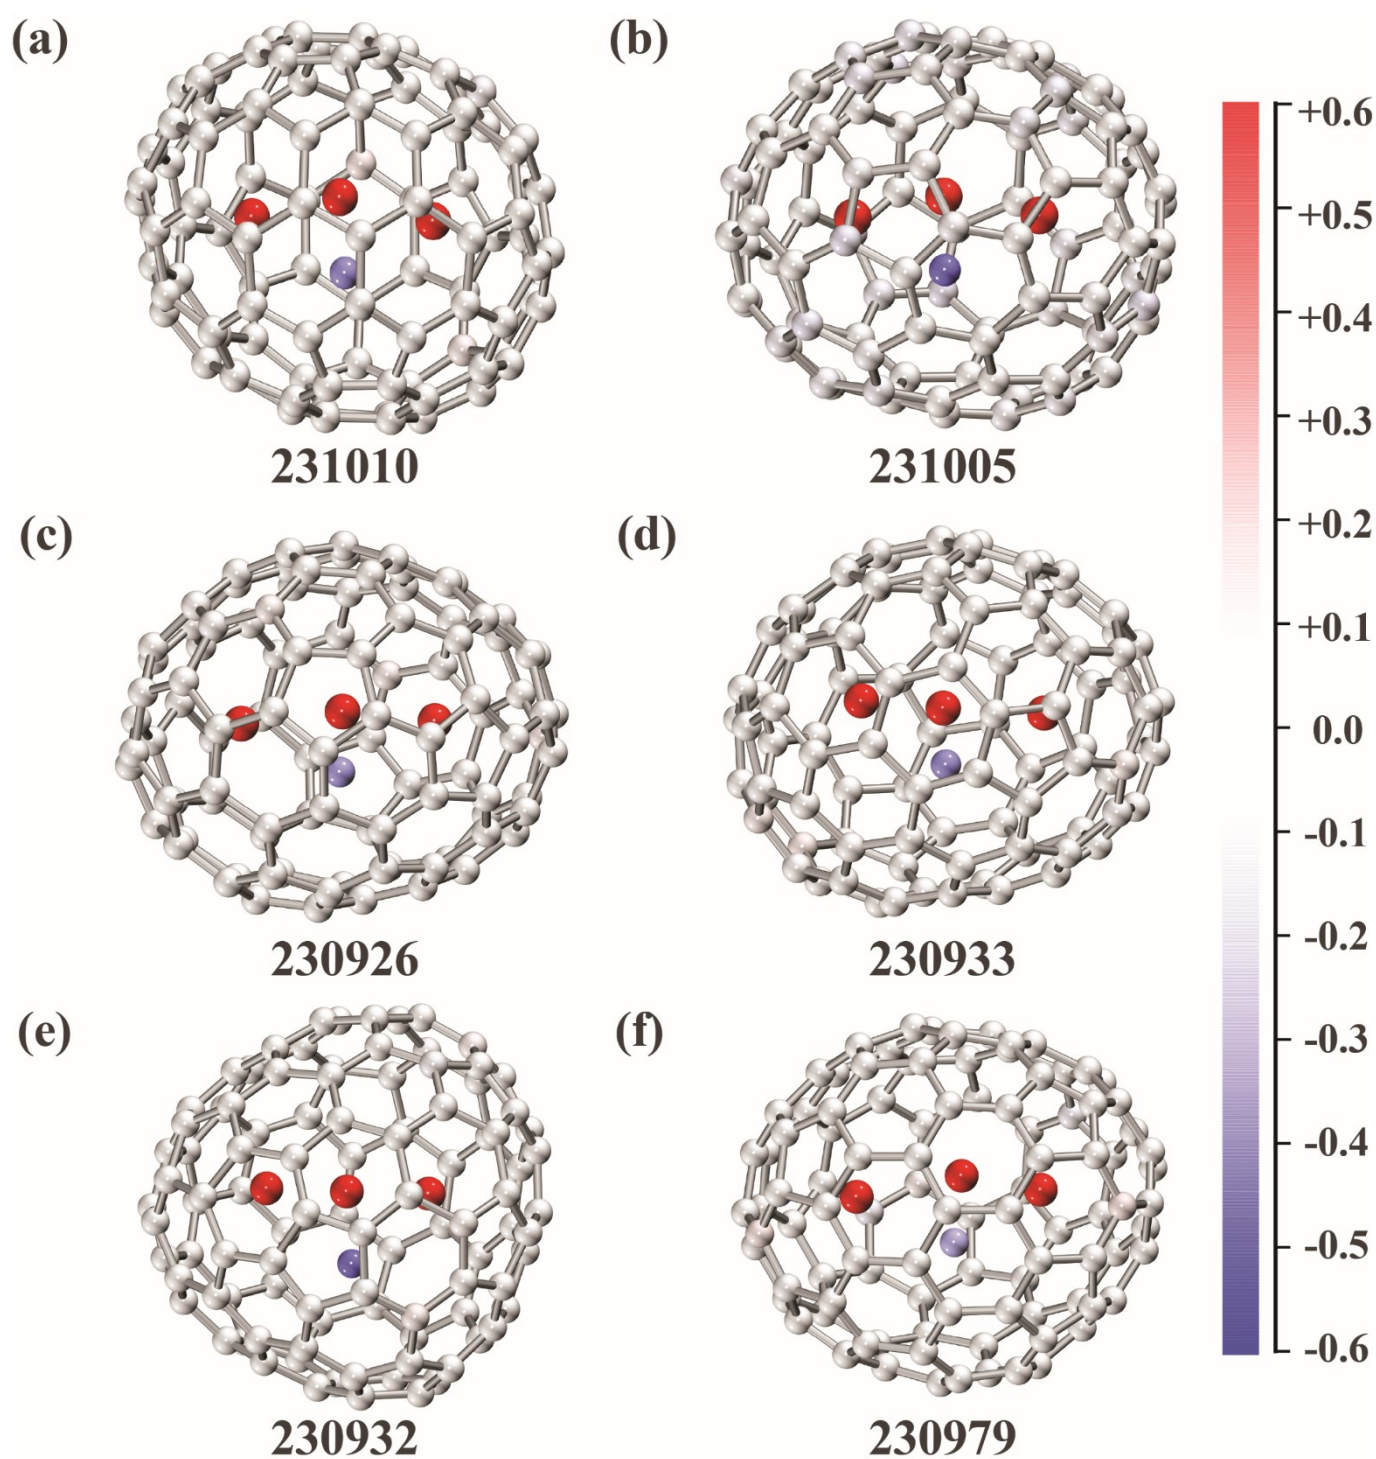

**Figure. S5** Mulliken charge distributions of  $\text{La}_3\text{Pt}@C_{98}$  isomers:  $\text{La}_3\text{Pt}@C2(231010)-C_{98}$  (a),  $\text{La}_3\text{Pt}@CI(231005)-C_{98}$  (b),  $\text{La}_3\text{Pt}@CI(230926)-C_{98}$  (c),  $\text{La}_3\text{Pt}@CI(230933)-C_{98}$  (d),  $\text{La}_3\text{Pt}@C2(230932)-C_{98}$  (e),  $\text{La}_3\text{Pt}@CI(230979)-C_{98}$  (f), which were calculated at the level of B3LYP/6-31g(d)/SDD.

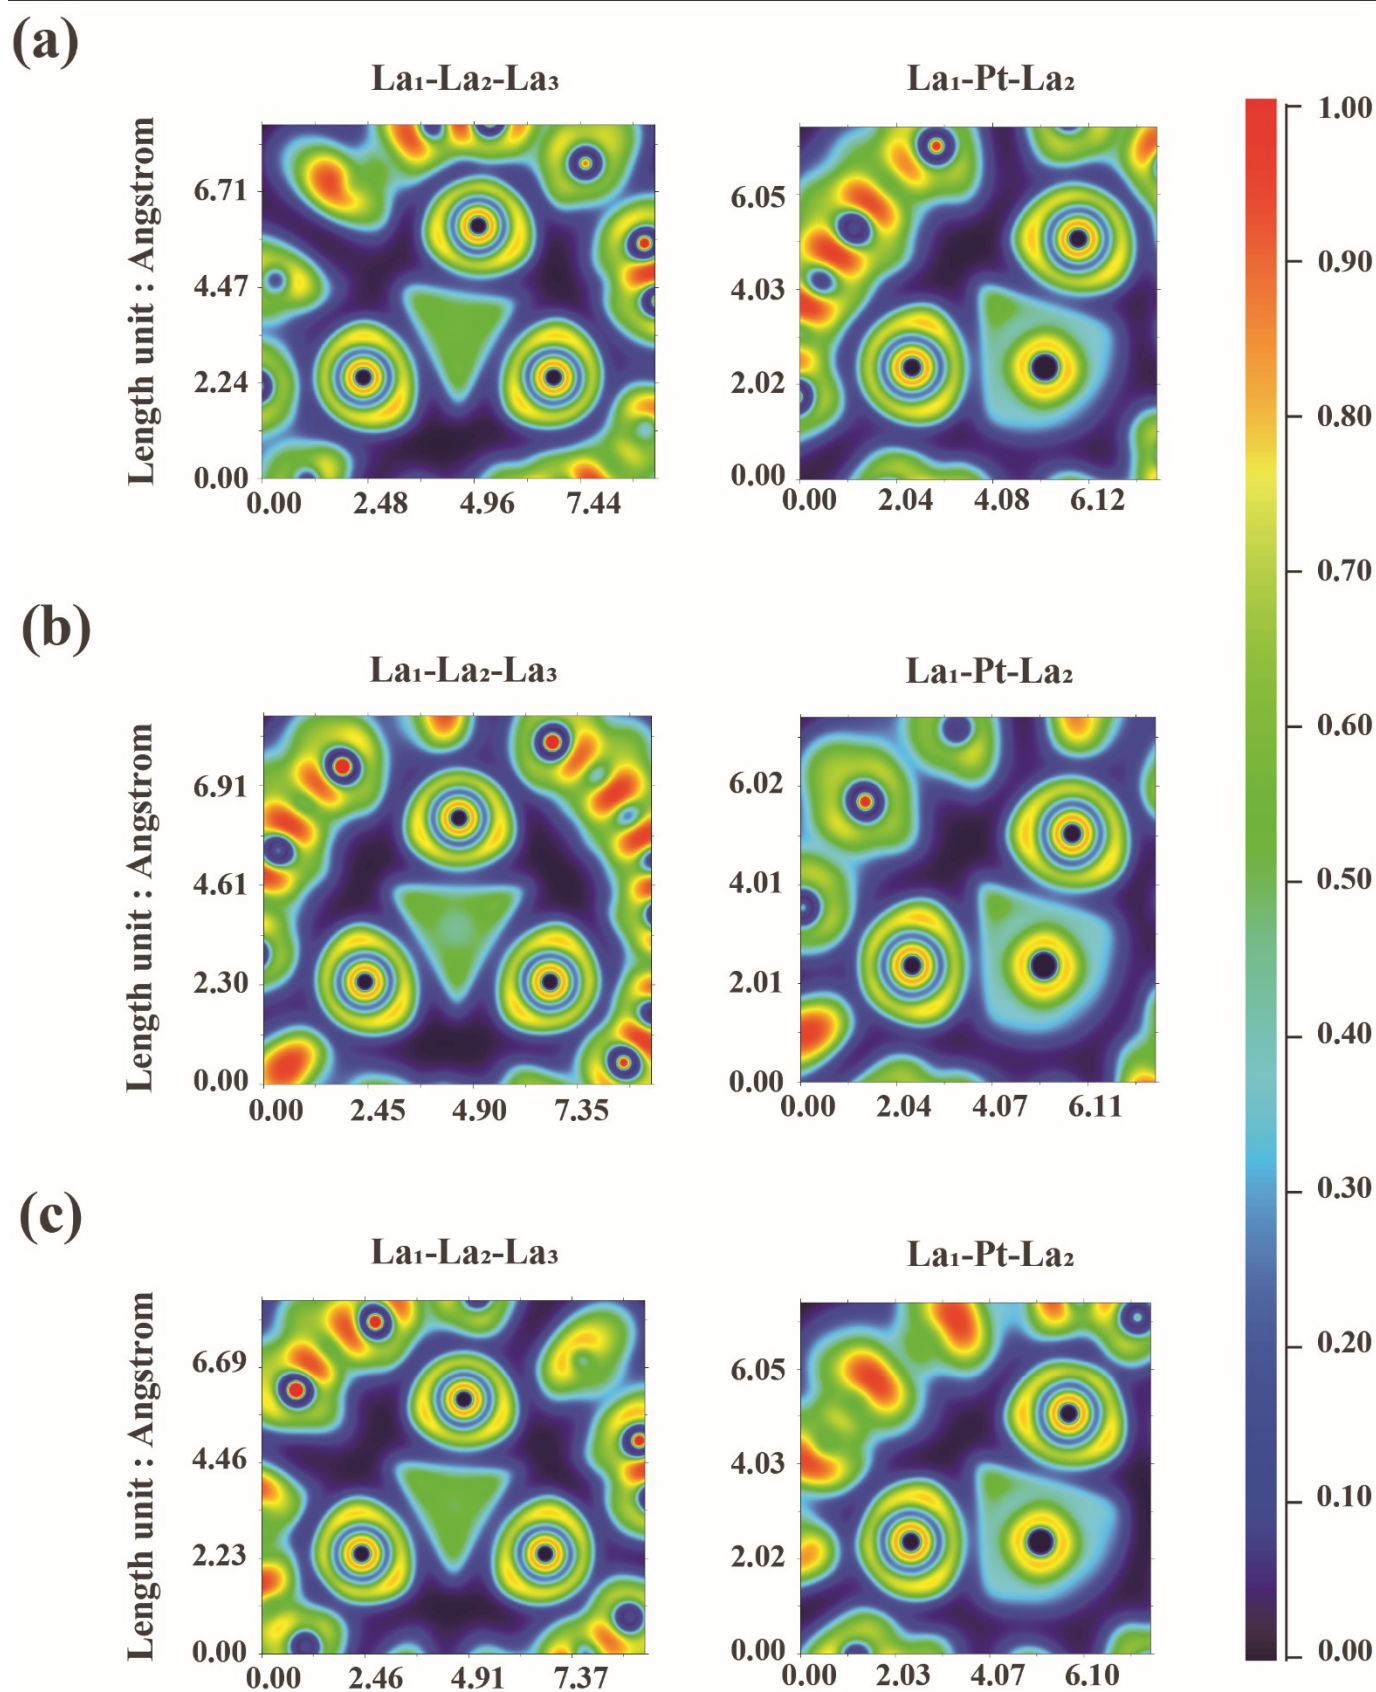

**Figure. S6** Electron localization function (ELF) analysis of  $\text{La}_3\text{Pt}@C_{98}$  isomers:  $\text{La}_3\text{Pt}@CI(231005)-C_{98}$  (a),  $\text{La}_3\text{Pt}@CI(230926)-C_{98}$  (b),  $\text{La}_3\text{Pt}@CI(230933)-C_{98}$  (c) in the  $\text{La}_1\text{-La}_2\text{-La}_3$  (left) and  $\text{La}_1\text{-Pt-La}_2$  (right) planes.



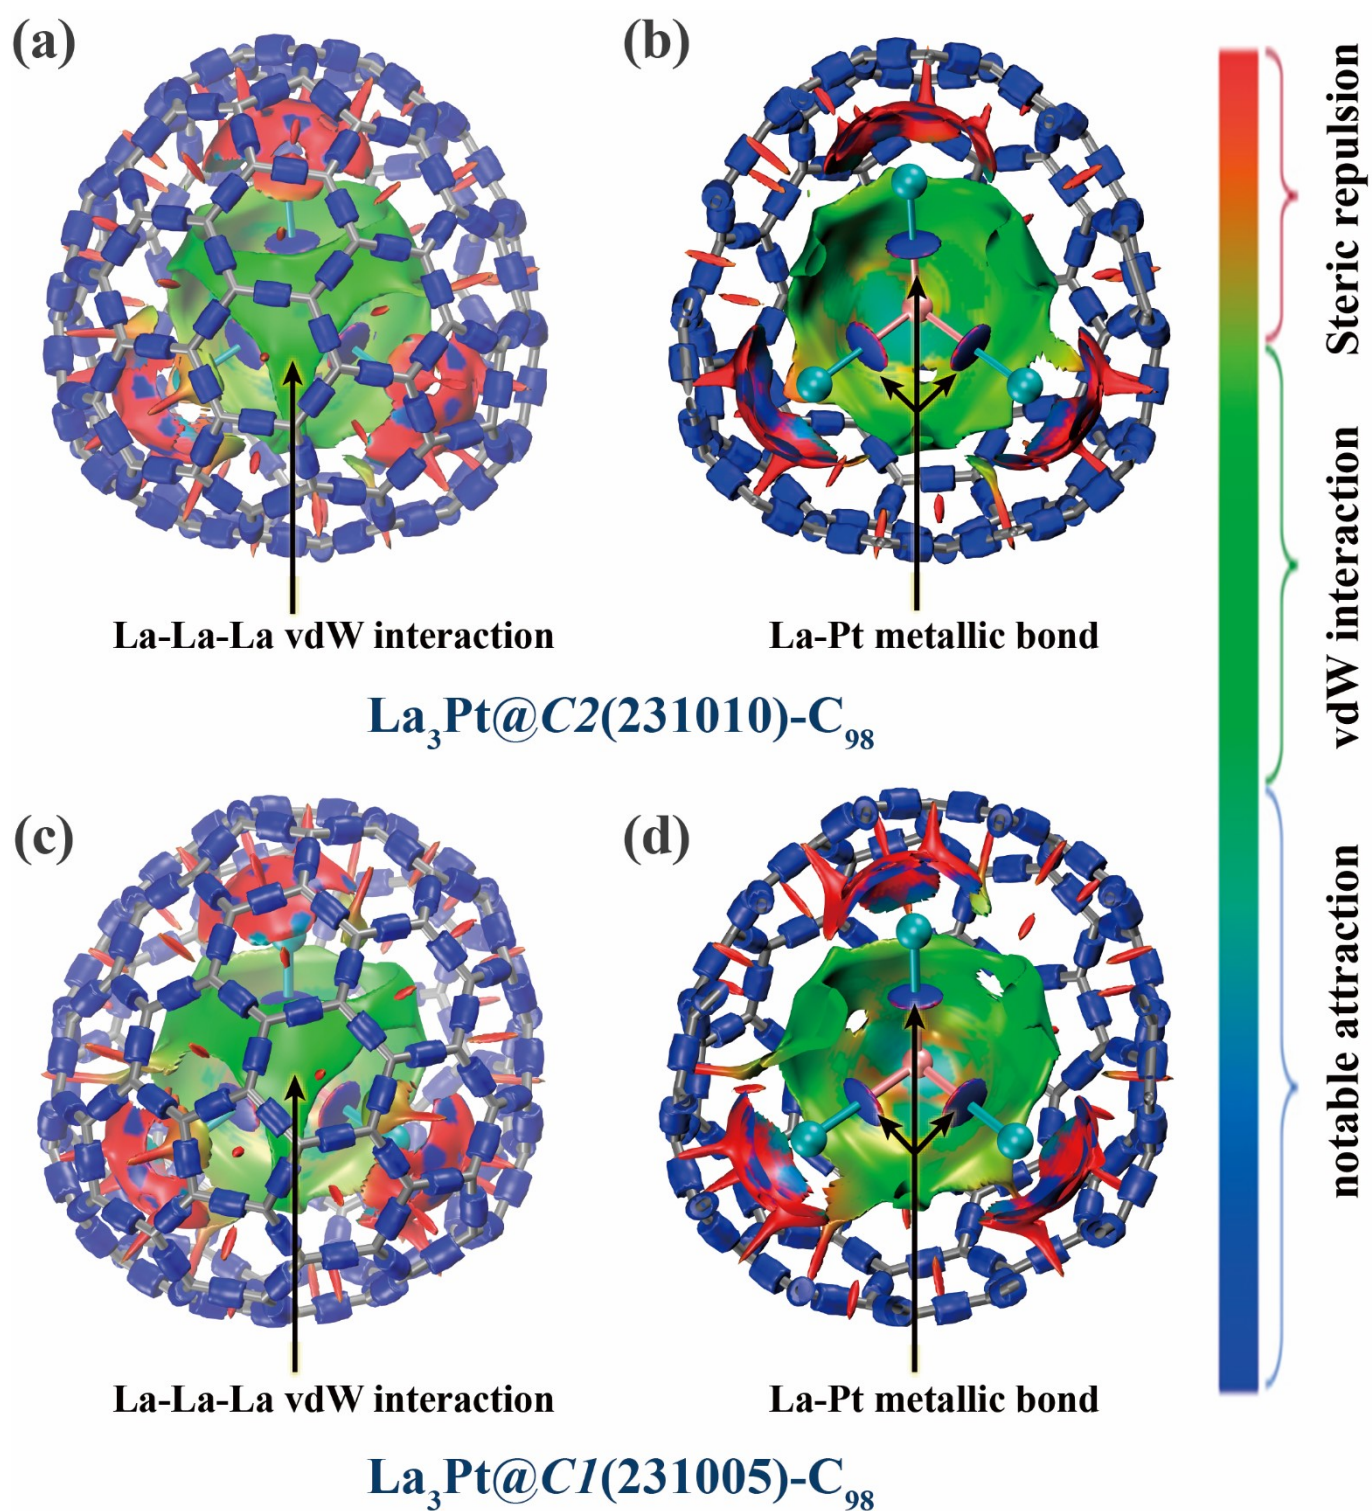

**Figure. S7** Color-coded map of intra-cluster interactions described by the interaction region indicator of  $\text{La}_3\text{Pt}@C_{98}$  isomers:  $\text{La}_3\text{Pt}@C1(231005)-C_{98}$  (a,b) and  $\text{La}_3\text{Pt}@C2(231010)-C_{98}$  (c,d), from full (a, c,) and half section views (b, d). The standard coloring method applied was shown in the right of the figure.

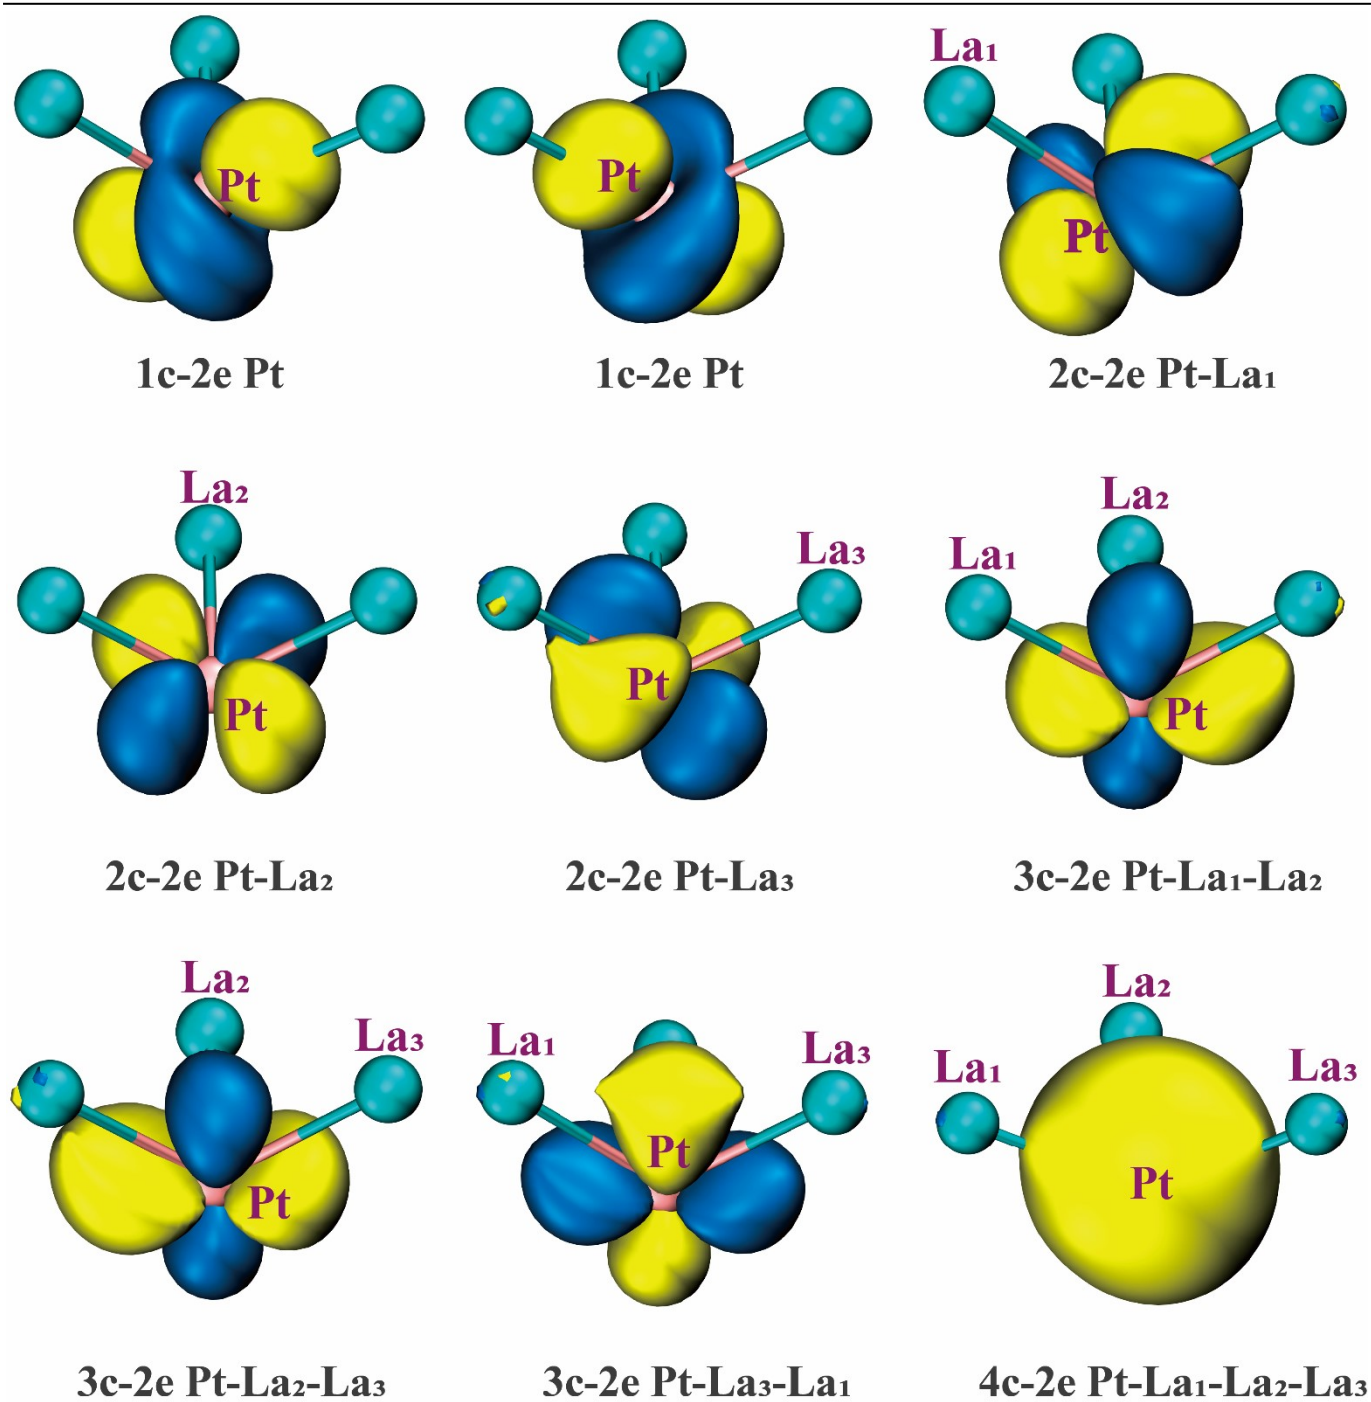

**Figure. S8** Adaptive natural density partitioning (adNDP) analysis results of  $\text{La}_3\text{Pt}@C1(231005)\text{-C}_{98}$ . To make the picture clearer, the outer fullerene cage has been removed purposely.



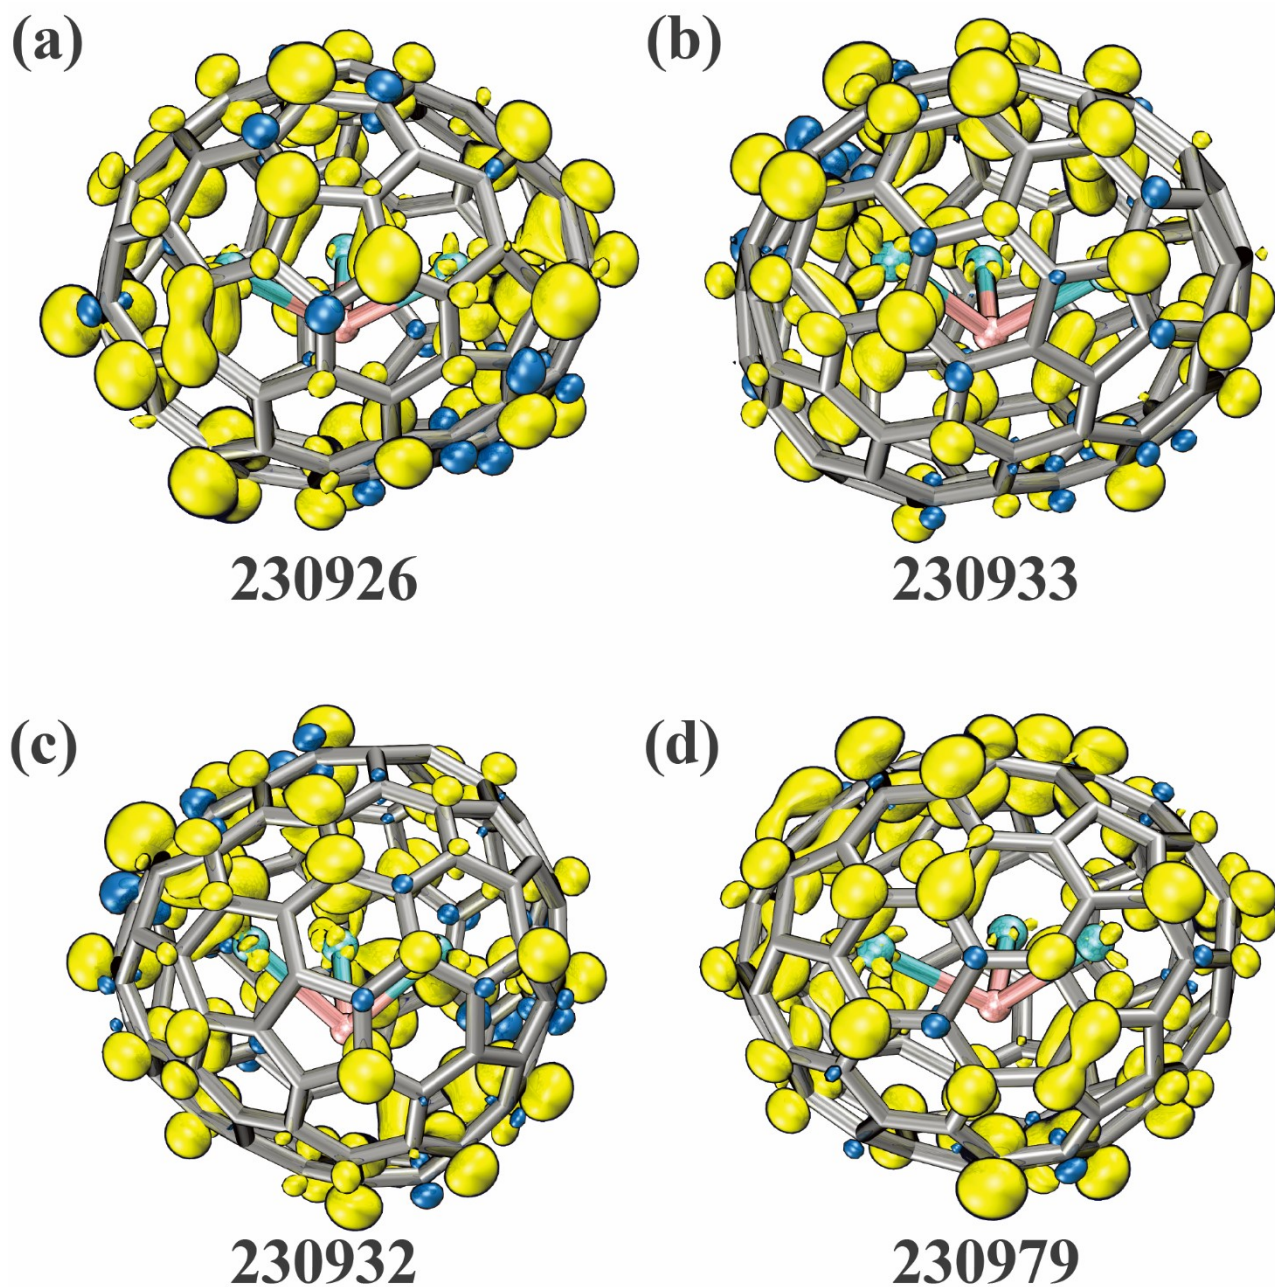

**Figure. S9** Electron spin density distributions of  $\text{La}_3\text{Pt}@C_{98}$  isomers:  $\text{La}_3\text{Pt}@C1(230926)-C_{98}$  (a),  $\text{La}_3\text{Pt}@C1(230933)-C_{98}$  (b),  $\text{La}_3\text{Pt}@C2(230932)-C_{98}$  (c),  $\text{La}_3\text{Pt}@C1(230979)-C_{98}$  (d), which were calculated at the level of B3LYP/6-31g(d)/SDD.



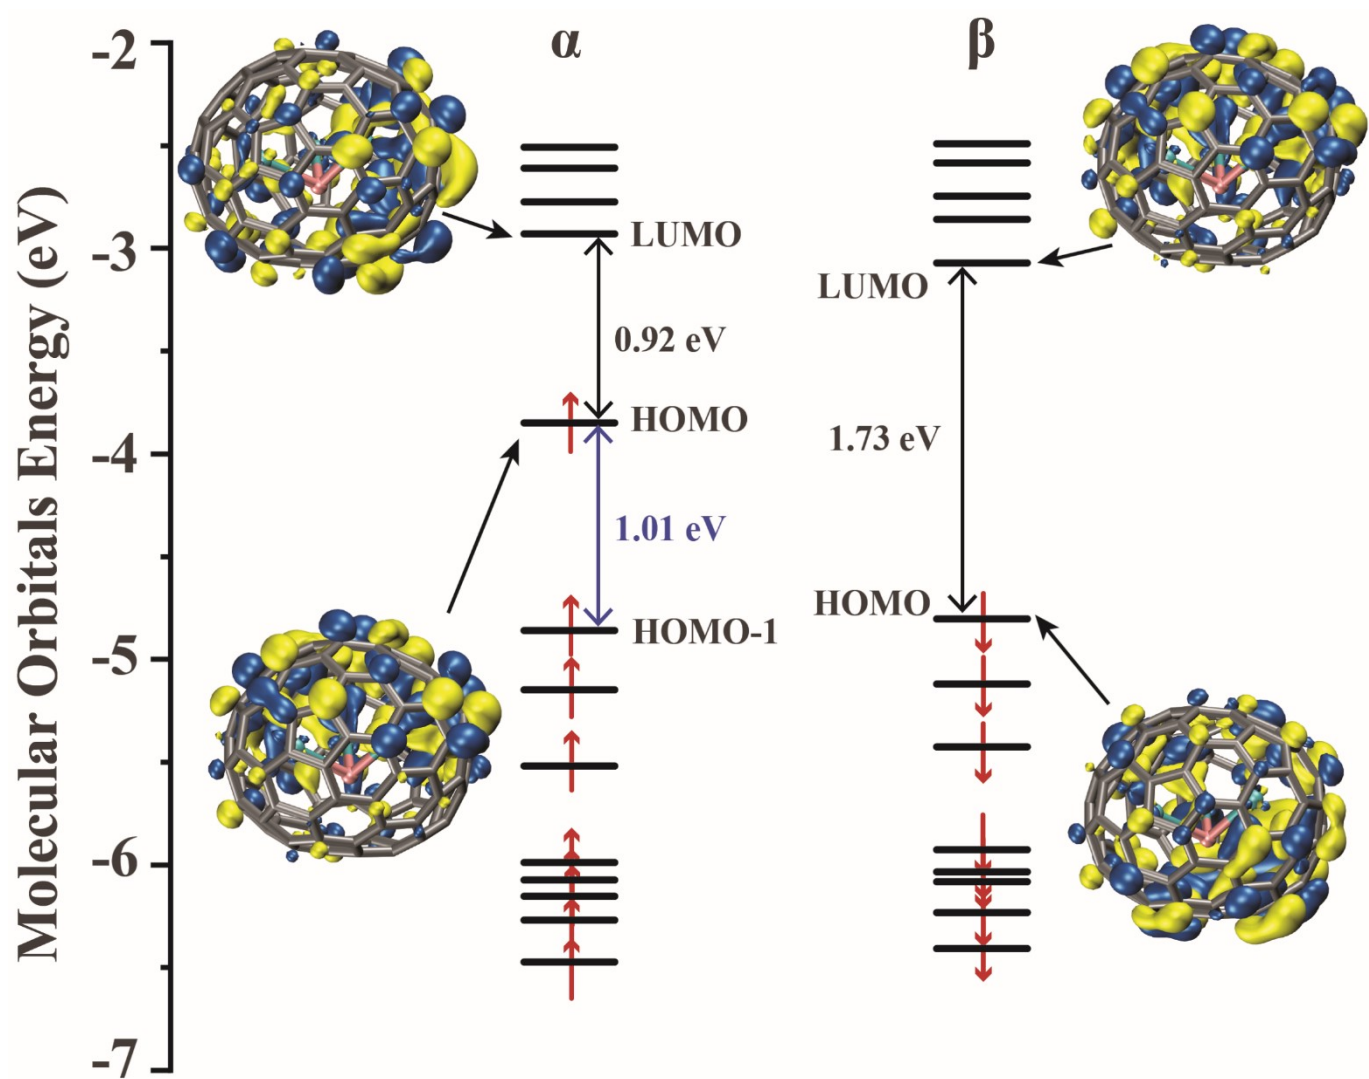

**Figure. S10** Main frontier molecular orbitals of La<sub>3</sub>Pt@CI(231005)-C<sub>98</sub>, calculated at the B3LYP/6-31g(d)/SDD level.

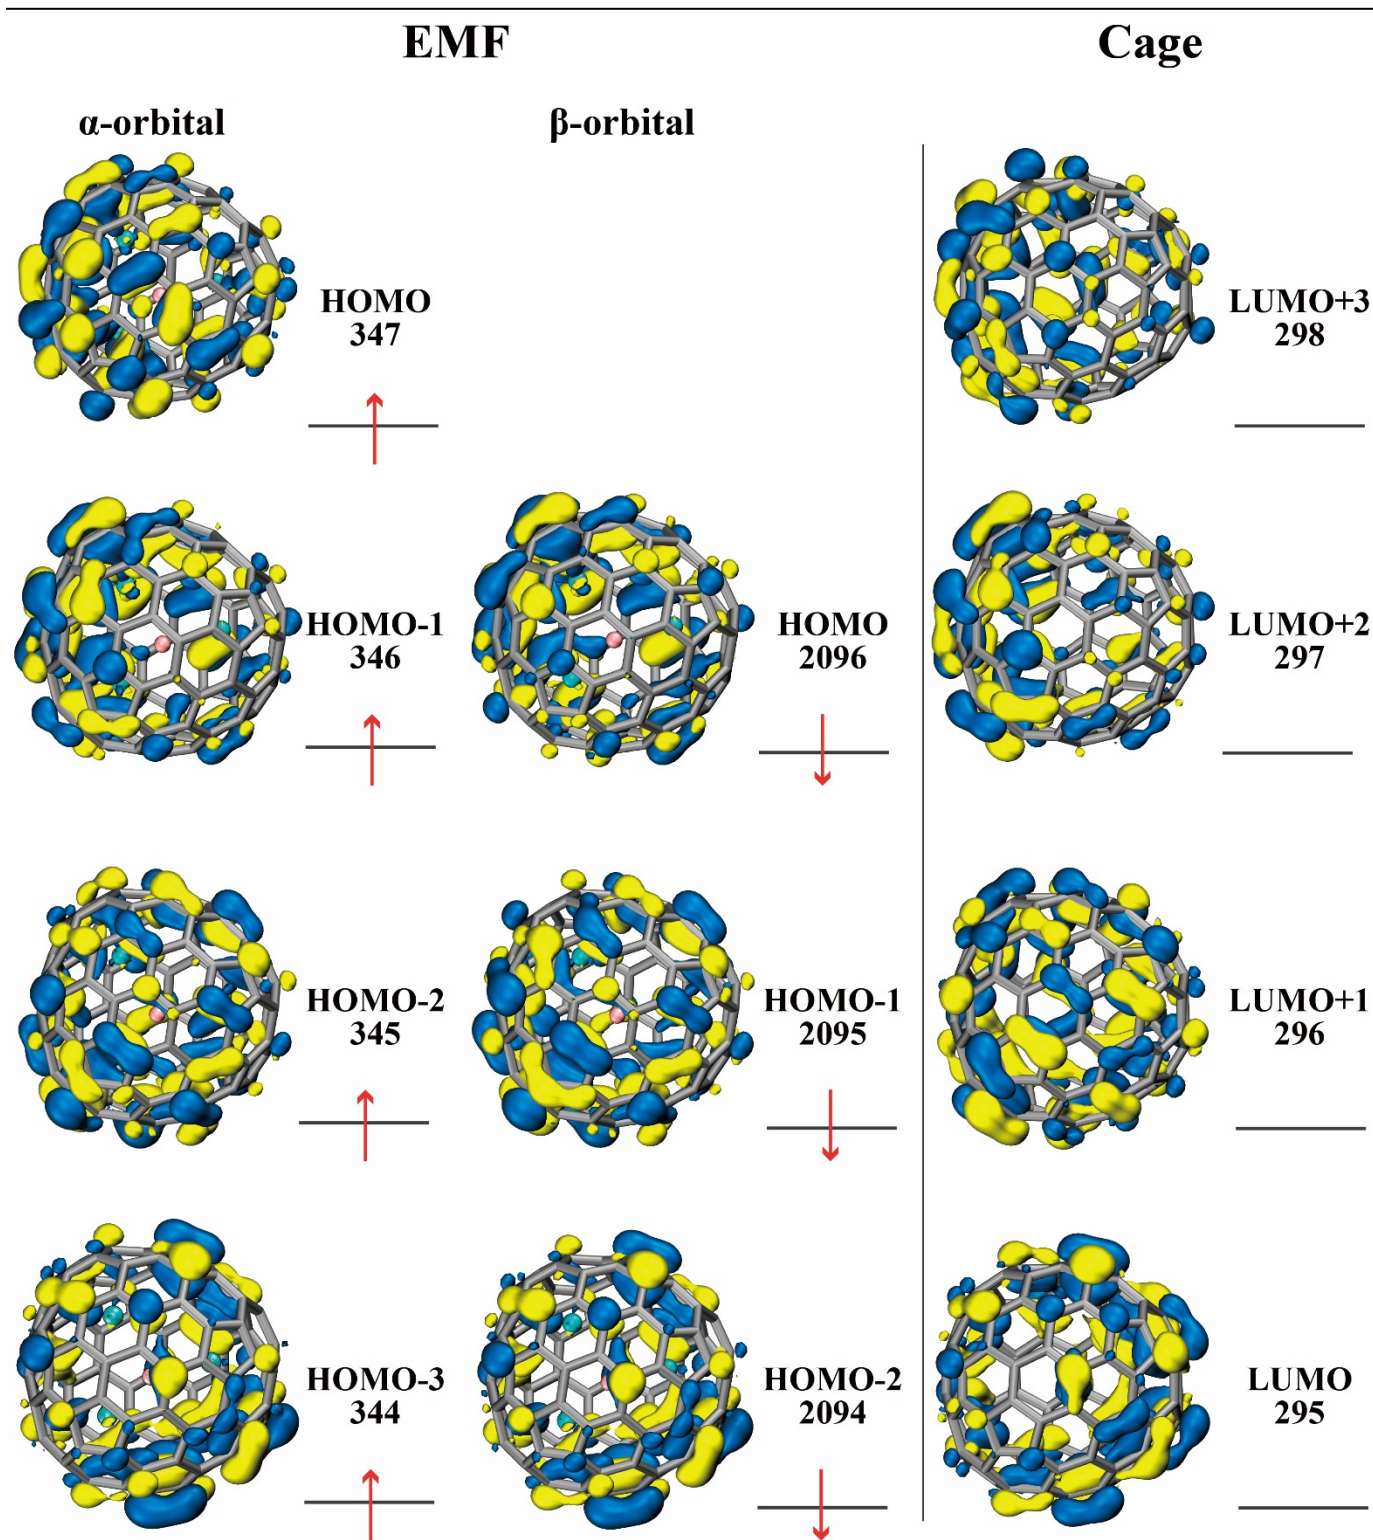

Figure. S11 The comparison of molecular orbitals of  $\text{La}_3\text{Pt}@C_2(231010)\text{-C}_{98}$  with those of empty  $\text{C}_{98}$ .

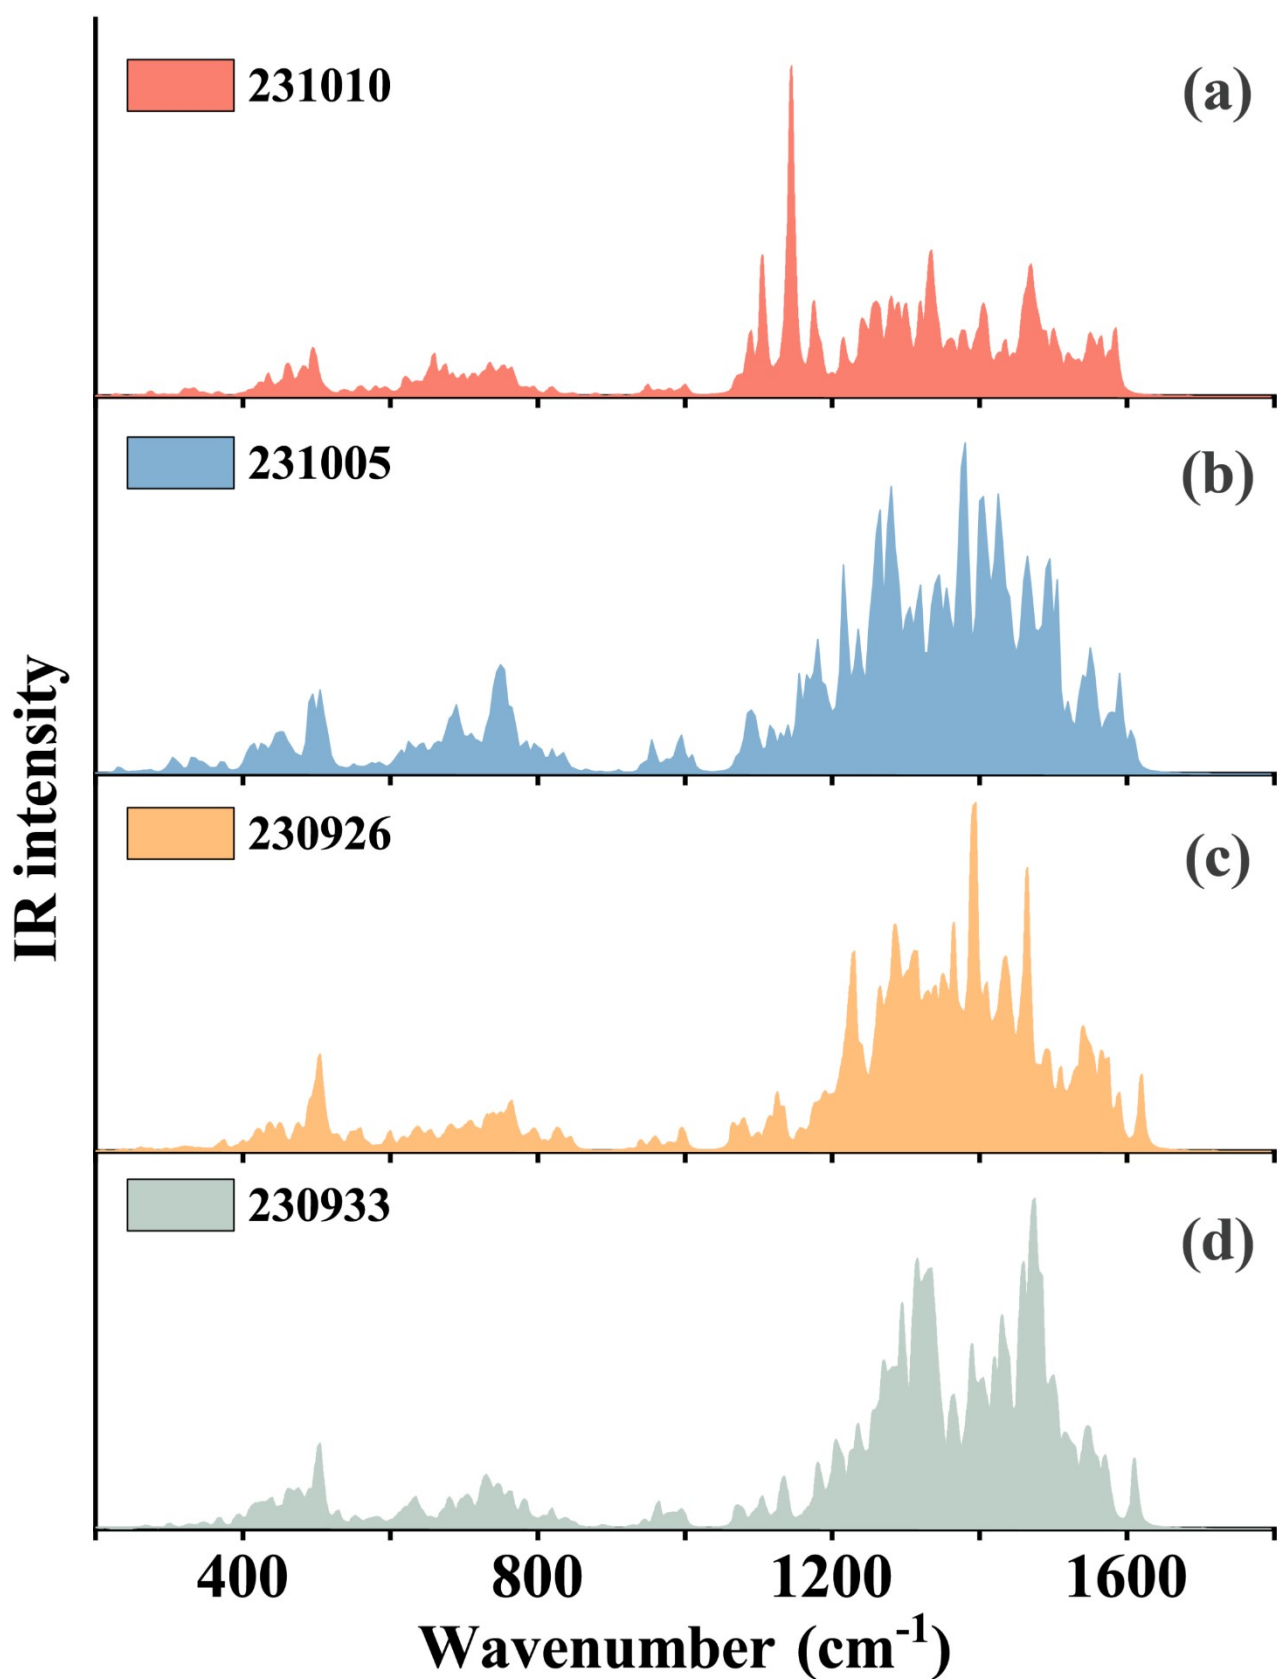

**Figure. S12** Simulated IR spectra of  $\text{La}_3\text{Pt}@C2(231010)\text{-C}_{98}$  (a),  $\text{La}_3\text{Pt}@C1(231005)\text{-C}_{98}$  (b),  $\text{La}_3\text{Pt}@C1(230926)\text{-C}_{98}$  (c) and  $\text{La}_3\text{Pt}@C1(230933)\text{-C}_{98}$  (d), which were calculated at the B3LYP/6-31g(d)/SDD level.

---

### 3 Supplementary Tables

#### Tables. S1–S15

**Table. S1** Relative energies of the top 15 isomers of  $C_{98}^{4-}$  before and after encapsulating  $La_3Pt$  clusters.

**Table. S2** Relative energies of the top 15 isomers of  $C_{98}^{6-}$  before and after encapsulating  $La_3Pt$  clusters.

**Table. S3** Relative energies of the top 15 isomers of  $C_{98}^{7-}$  before and after encapsulating  $La_3Pt$  clusters.

**Table. S4** Relative energies of the top 15 isomers of  $C_{98}^{8-}$  before and after encapsulating  $La_3Pt$  clusters.

**Table. S5** Relative energies and corresponding ranks of  $La_3Pt@C_{98}$  isomers based on three different methods.

**Table. S6** Relative energies and corresponding ranks, together with HOMO-LUMO gaps of  $La_3Pt@C_{98}$  and  $La_3Pt@C_{98}^+$  isomers at the B3LYP/6-31g(d)/SDD level.

**Table. S7** Comparison of La-C and Pt-C bond lengths (in Å) in  $La_3Pt@C_{98}$  isomers.

**Table. S8** Comparison of La-La, La-Pt and La-C bond lengths (in Å) in the cages of  $La_3N@C_{88,92,96}$  and  $La_3Pt@C_{98}$ . \*

**Table. S9** Relative energies and HOMO–LUMO gaps of conformational isomers of  $La_3Pt@C_{98}$  at the B3LYP/6-31g(d)/SDD level.

**Table. S10** La-La and La-Pt bond lengths (in Å), La-Pt-La bond angles (in degree) of the metal cluster  $La_3Pt$  in these conformational isomers of  $La_3Pt@C_{98}$  at the

---

B3LYP/6-31g(d)/SDD level.

**Table. S11** La-C, Pt-C bond lengths (in Å), and the coordinated environment of three La atoms in the cages of these conformational isomers of La<sub>3</sub>Pt@C<sub>98</sub> at the B3LYP/6-31g(d)/SDD level.

**Table. S12** Mulliken charge distributions of the top 10 La<sub>3</sub>Pt@C<sub>98</sub> isomers

**Table. S13** Hirshfeld charge distributions of the top 10 La<sub>3</sub>Pt@C<sub>98</sub> isomers

**Table. S14** Voronoi deformation density (VDD) charge distributions of the top 10 La<sub>3</sub>Pt@C<sub>98</sub> isomers

**Table. S15** Total Mayer Bond Orders between La (Pt) and C atoms coordinated to them in La<sub>3</sub>Pt@C<sub>98</sub> isomers.

**Table. S1** Relative energies of the top 15 isomers of  $C_{98}^{4-}$  before and after encapsulating  $La_3Pt$  clusters.

| Spiral ID | IPR code | Symmetry | Empty cage <sup>a</sup> | EMF <sup>b</sup> |
|-----------|----------|----------|-------------------------|------------------|
| 230979    | 221      | $C_1$    | 0.00                    | 5.58             |
| 230933    | 175      | $C_1$    | 0.32                    | 3.72             |
| 230926    | 168      | $C_1$    | 0.82                    | 3.09             |
| 230925    | 167      | $C_{2v}$ | 1.13                    | 12.61            |
| 230924    | 166      | $C_2$    | 1.49                    | 7.36             |
| 230927    | 169      | $C_1$    | 3.23                    | ----             |
| 230941    | 183      | $C_1$    | 3.32                    | ----             |
| 230839    | 81       | $C_{2v}$ | 3.44                    | ----             |
| 230938    | 180      | $C_2$    | 4.97                    | ----             |
| 230931    | 173      | $C_1$    | 5.43                    | ----             |
| 230889    | 131      | $C_1$    | 6.54                    | ----             |
| 230932    | 174      | $C_2$    | 6.63                    | 5.57             |
| 230969    | 211      | $C_2$    | 6.83                    | ----             |
| 231005    | 247      | $C_1$    | 7.19                    | 1.21             |
| 230947    | 189      | $C_2$    | 7.33                    | ----             |

a. Empty carbon cages  $C_{98}^{4-}$  were optimized with the method of B3LYP/6-31g(d). The top five fullerenes were selected for the next-step optimization. Due to the complexity of computation, the calculation for some less important EMFs with higher-energy empty cages was not performed here.

b. Optimized with the method of 6-31g(d)/SDD.

**Table. S2** Relative energies of the top 15 isomers of  $C_{98}^{6-}$  before and after encapsulating  $La_3Pt$  clusters.

| Spiral ID | IPR code | Symmetry | Empty cage <sup>a</sup> | EMF <sup>b</sup> |
|-----------|----------|----------|-------------------------|------------------|
| 230924    | 166      | $C_2$    | 0.00                    | 7.36             |
| 231005    | 247      | $C_1$    | 3.71                    | 1.21             |
| 231010    | 252      | $C_2$    | 7.42                    | 0.00             |
| 230933    | 175      | $C_1$    | 10.74                   | 3.72             |
| 230926    | 168      | $C_1$    | 11.16                   | 3.09             |
| 230932    | 174      | $C_1$    | 11.27                   | 5.57             |
| 230979    | 221      | $C_2$    | 11.62                   | 5.58             |
| 231004    | 246      | $C_2$    | 12.42                   | 8.67             |
| 230925    | 167      | $C_{2v}$ | 12.61                   | 12.61            |
| 230919    | 161      | $C_1$    | 12.91                   | 17.68            |
| 231006    | 248      | $C_2$    | 13.17                   | ----             |
| 230947    | 189      | $C_2$    | 13.87                   | ----             |
| 231017    | 259      | $C_2$    | 15.00                   | ----             |
| 230973    | 215      | $C_2$    | 15.12                   | ----             |
| 230944    | 186      | $C_1$    | 15.17                   | ----             |

a. Empty carbon cages  $C_{98}^{6-}$  were optimized with the method of B3LYP/6-31g(d). The top ten fullerenes were selected for the next-step optimization. Due to the complexity of computation, the calculation for some less important EMFs with higher-energy empty cages was not performed here.

b. Optimized with the method of 6-31g(d)/SDD.

**Table. S3** Relative energies of the top 15 isomers of  $C_{98}^{7-}$  before and after encapsulating  $La_3Pt$  clusters.

| Spiral ID | IPR code | Symmetry | Empty cage <sup>a</sup> | EMF <sup>b</sup> |
|-----------|----------|----------|-------------------------|------------------|
| 230924    | 166      | $C_2$    | 0.00                    | 7.36             |
| 231005    | 247      | $C_1$    | 4.69                    | 1.21             |
| 230925    | 167      | $C_{2v}$ | 6.09                    | 12.61            |
| 230979    | 221      | $C_2$    | 6.48                    | 5.58             |
| 230926    | 168      | $C_1$    | 7.49                    | 3.09             |
| 230933    | 175      | $C_1$    | 7.67                    | 3.72             |
| 231010    | 252      | $C_2$    | 8.17                    | 0.00             |
| 230932    | 174      | $C_1$    | 8.87                    | 5.57             |
| 231004    | 246      | $C_2$    | 11.01                   | 8.67             |
| 230919    | 161      | $C_1$    | 12.01                   | 17.68            |
| 230947    | 189      | $C_2$    | 12.48                   | ----             |
| 230941    | 183      | $C_2$    | 12.73                   | ----             |
| 230839    | 81       | $C_2$    | 14.13                   | 8.72             |
| 230982    | 224      | $C_2$    | 14.43                   | ----             |
| 230942    | 184      | $C_2$    | 14.56                   | ----             |

a. Empty carbon cages  $C_{98}^{7-}$  were optimized with the method of B3LYP/6-31g(d). The top ten fullerenes were selected for the next-step optimization. Due to the complexity of computation, the calculation for some less important EMFs with higher-energy empty cages was not performed here.

b. Optimized with the method of 6-31g(d)/SDD.



**Table. S4** Relative energies of the top 15 isomers of  $C_{98}^{8-}$  before and after encapsulating  $La_3Pt$  clusters.

| Spiral ID | IPR code | Symmetry | Empty cage <sup>a</sup> | EMF <sup>b</sup> |
|-----------|----------|----------|-------------------------|------------------|
| 230924    | 166      | $C_2$    | 0.00                    | 7.36             |
| 230925    | 167      | $C_{2v}$ | 1.89                    | 12.61            |
| 230932    | 174      | $C_2$    | 6.42                    | 5.57             |
| 230926    | 168      | $C_1$    | 6.89                    | 3.09             |
| 230933    | 175      | $C_1$    | 8.29                    | 3.72             |
| 230922    | 164      | $C_1$    | 9.57                    | 12.64            |
| 231005    | 247      | $C_1$    | 9.72                    | 1.21             |
| 230839    | 81       | $C_2$    | 11.03                   | 8.72             |
| 230947    | 189      | $C_2$    | 11.18                   | ----             |
| 230927    | 169      | $C_1$    | 12.22                   | ----             |
| 230938    | 180      | $C_1$    | 12.36                   | ----             |
| 231010    | 252      | $C_2$    | 12.83                   | 0.00             |
| 231004    | 246      | $C_2$    | 12.87                   | 8.67             |
| 230969    | 211      | $C_2$    | 14.12                   | ----             |
| 230941    | 183      | $C_2$    | 14.33                   | ----             |

a. Empty carbon cages  $C_{98}^{8-}$  were optimized with the method of B3LYP/6-31g(d). The top eight fullerenes were selected for the next-step optimization. Due to the complexity of computation, the calculation for some less important EMFs with higher-energy empty cages was not performed here.

b. Optimized with the method of 6-31g(d)/SDD.

**Table. S5** Relative energies and corresponding ranks of La<sub>3</sub>Pt@C<sub>98</sub> isomers based on three different methods.

| Spiral ID | Method-A <sup>a</sup> |                  | Method-B <sup>b</sup> |                  | Method-C <sup>c</sup> |                  |
|-----------|-----------------------|------------------|-----------------------|------------------|-----------------------|------------------|
|           | Rank <sup>d</sup>     | ΔE (in kcal/mol) | Rank <sup>d</sup>     | ΔE (in kcal/mol) | Rank <sup>d</sup>     | ΔE (in kcal/mol) |
| 231010    | 1                     | 0.00             | 1                     | 0.00             | 1                     | 0.00             |
| 231005    | 2                     | 1.21             | 2                     | 1.59             | 2                     | 0.25             |
| 230926    | 3                     | 3.09             | 3                     | 5.01             | 3                     | 1.59             |
| 230933    | 4                     | 3.72             | 4                     | 4.38             | 4                     | 3.28             |
| 230932    | 5                     | 5.57             | 7                     | 6.88             | 5                     | 5.41             |
| 230979    | 6                     | 5.58             | 6                     | 6.84             | 6                     | 5.43             |
| 230924    | 7                     | 7.36             | 5                     | 6.43             | 7                     | 7.25             |
| 231004    | 8                     | 8.67             | 8                     | 9.06             | 8                     | 9.49             |
| 230839    | 9                     | 8.72             | 9                     | 9.90             | 9                     | 9.55             |
| 168785    | 10                    | 12.59            | 10                    | 11.23            | 10                    | 9.76             |

a. Method-A: B3LYP/6-31g(d)/SDD;

b. Method-B: wB97X-D/6-31g(d)/SDD;

c. Method-C: TPSSH/6-31g(d)/SDD.

d. The relative energy order of the top 10 La<sub>3</sub>Pt@C<sub>98</sub> isomers with three different methods.

**Table. S6** Relative energies and corresponding ranks, together with HOMO-LUMO gaps of  $\text{La}_3\text{Pt}@C_{98}$  and  $\text{La}_3\text{Pt}@C_{98}^+$  isomers at the B3LYP/6-31g(d)/SDD level.

| Spiral ID | $\text{La}_3\text{Pt}@C_{98}$ <sup>a</sup> |                          |             | $\text{La}_3\text{Pt}@C_{98}^+$ <sup>b</sup> |                          |             |
|-----------|--------------------------------------------|--------------------------|-------------|----------------------------------------------|--------------------------|-------------|
|           | Rank <sup>c</sup>                          | $\Delta E$ (in kcal/mol) | Gap (in eV) | Rank <sup>c</sup>                            | $\Delta E$ (in kcal/mol) | Gap (in eV) |
| 231010    | 1                                          | 0.00                     | 0.78/1.67   | 2                                            | 2.00                     | 1.50        |
| 231005    | 2                                          | 1.21                     | 0.92/1.73   | 1                                            | 0                        | 1.57        |
| 230926    | 3                                          | 3.09                     | 1.11/1.28   | 3                                            | 6.61                     | 1.20        |
| 230933    | 4                                          | 3.72                     | 1.10/1.30   | 6                                            | 8.17                     | 1.20        |
| 230932    | 5                                          | 5.57                     | 0.76/1.27   | 4                                            | 7.50                     | 1.25        |
| 230979    | 6                                          | 5.58                     | 1.19/1.24   | 5                                            | 7.51                     | 1.24        |
| 230924    | 7                                          | 7.36                     | 0.87/1.72   | 7                                            | 10.68                    | 1.49        |
| 231004    | 8                                          | 8.67                     | 1.02/1.68   | 8                                            | 10.79                    | 1.37        |
| 230839    | 9                                          | 8.72                     | 1.07/1.85   | 9                                            | 12.85                    | 1.49        |
| 168785    | 10                                         | 12.59                    | 1.12/2.09   | 10                                           | 16.28                    | 1.58        |

a. Relative energies and corresponding ranks, together with HOMO-LUMO gaps of  $\text{La}_3\text{Pt}@C_{98}$ , which were calculated at the level of UB3LYP/6-31g(d)/SDD;

b. Relative energies and corresponding ranks, together with HOMO-LUMO gaps of  $\text{La}_3\text{Pt}@C_{98}^+$ , which were calculated at the level of B3LYP/6-31g(d)/SDD.

c. The relative energy order of the top 10  $\text{La}_3\text{Pt}@C_{98}$  and  $\text{La}_3\text{Pt}@C_{98}^+$  isomers at the B3LYP/6-31g(d)/SDD level.

**Table. S7** Comparison of La-C and Pt-C bond lengths (in Å) in La<sub>3</sub>Pt@C<sub>98</sub> isomers.

| Spiral ID | La-C (Carbon Cage) (in Å) <sup>a</sup> |                    |                    |                    | Pt-C (in Å) | Coordinated Environment <sup>b</sup> |                 |                 |
|-----------|----------------------------------------|--------------------|--------------------|--------------------|-------------|--------------------------------------|-----------------|-----------------|
|           | La-C                                   | La <sub>1</sub> -C | La <sub>2</sub> -C | La <sub>3</sub> -C |             | La <sub>1</sub>                      | La <sub>2</sub> | La <sub>3</sub> |
| 231010    | 2.52                                   | 2.52               | 2.53               | 2.51               | 3.10        | acenaphthylene                       | penalene        | acenaphthylene  |
| 231005    | 2.52                                   | 2.51               | 2.54               | 2.52               | 3.01        | acenaphthylene                       | hexagon         | acenaphthylene  |
| 230926    | 2.53                                   | 2.53               | 2.56               | 2.52               | 2.93        | acenaphthylene                       | hexagon         | acenaphthylene  |
| 230933    | 2.53                                   | 2.52               | 2.54               | 2.52               | 3.04        | acenaphthylene                       | pentagon        | acenaphthylene  |
| 230932    | 2.52                                   | 2.50               | 2.51               | 2.54               | 3.03        | acenaphthylene                       | naphthalene     | pentagon        |
| 230979    | 2.54                                   | 2.52               | 2.51               | 2.58               | 3.24        | hexagon                              | hexagon         | hexagon         |
| 230924    | 2.57                                   | 2.56               | 2.56               | 2.60               | 3.00        | hexagon                              | naphthalene     | pentagon        |
| 231010    | 2.54                                   | 2.53               | 2.54               | 2.54               | 3.14        | acenaphthylene                       | pentagon        | naphthalene     |
| 230839    | 2.51                                   | 2.51               | 2.50               | 2.51               | 3.37        | acenaphthylene                       | acenaphthylene  | acenaphthylene  |
| 168785    | 2.57                                   | 2.54               | 2.55               | 2.63               | 3.16        | naphthalene                          | acenaphthylene  | pentagon        |

- a. The La<sub>1</sub>-C, La<sub>2</sub>-C, La<sub>3</sub>-C bond lengths are the distances between the three La atoms and their nearest C atoms in the cages of La<sub>3</sub>Pt@C<sub>98</sub> isomers, and the La-C bond lengths are the average distances of the three values.
- b. The coordinated environment of La atoms has a series of types: pentagon (La atom coordinates with a pentagonal carbon ring of the cage); hexagon (La atom coordinates with a hexagonal carbon ring of the cage); naphthalene (La atom is located near the junctions of two hexagons); acenaphthylene (La atom is situated at the junctions of one pentagon and two hexagons); penalene (La atom is located near the junctions of three hexagons).

**Table. S8** Comparison of La-La distances, La-Pt and La-C bond lengths (in Å) in the cages of La<sub>3</sub>N@C<sub>88,92,96</sub> and La<sub>3</sub>Pt@C<sub>98</sub>.

\*

| EMFs                               |          | La-La distances (in Å) <sup>a</sup> |                                      |                                      |                                      | La-Pt bond lengths (in Å) <sup>b</sup> |                         |                         |                         | La-C bond lengths (in Å) <sup>c</sup> |                    |                    |                    |
|------------------------------------|----------|-------------------------------------|--------------------------------------|--------------------------------------|--------------------------------------|----------------------------------------|-------------------------|-------------------------|-------------------------|---------------------------------------|--------------------|--------------------|--------------------|
| Types <sup>d</sup>                 | IPR-code | La-La                               | La <sub>1</sub> -<br>La <sub>2</sub> | La <sub>2</sub> -<br>La <sub>3</sub> | La <sub>3</sub> -<br>La <sub>1</sub> | La-Pt                                  | La <sub>1</sub> -<br>Pt | La <sub>2</sub> -<br>Pt | La <sub>3</sub> -<br>Pt | La-C                                  | La <sub>1</sub> -C | La <sub>2</sub> -C | La <sub>3</sub> -C |
| La <sub>3</sub> N@C <sub>88</sub>  | 31       | 3.83                                | 3.67                                 | 3.91                                 | 3.90                                 | 2.21                                   | 2.19                    | 2.23                    | 2.22                    | 2.62                                  | 2.64               | 2.60               | 2.62               |
| La <sub>3</sub> N@C <sub>92</sub>  | 86       | 3.78                                | 3.78                                 | 3.78                                 | 3.78                                 | 2.19                                   | 2.19                    | 2.19                    | 2.19                    | 2.55                                  | 2.55               | 2.55               | 2.55               |
| La <sub>3</sub> N@C <sub>96</sub>  | 186      | 3.95                                | 4.07                                 | 3.89                                 | 3.89                                 | 2.28                                   | 2.29                    | 2.28                    | 2.28                    | 2.64                                  | 2.63               | 2.65               | 2.65               |
|                                    | 252      | 4.30                                | 4.53                                 | 4.32                                 | 4.06                                 | 2.81                                   | 2.81                    | 2.80                    | 2.83                    | 2.52                                  | 2.52               | 2.53               | 2.51               |
| La <sub>3</sub> Pt@C <sub>98</sub> | 247      | 4.29                                | 4.45                                 | 4.45                                 | 3.96                                 | 2.80                                   | 2.81                    | 2.81                    | 2.78                    | 2.52                                  | 2.51               | 2.54               | 2.52               |
|                                    | 168      | 4.36                                | 4.33                                 | 4.39                                 | 4.35                                 | 2.79                                   | 2.80                    | 2.75                    | 2.81                    | 2.53                                  | 2.53               | 2.56               | 2.52               |
|                                    | 175      | 4.30                                | 4.36                                 | 4.40                                 | 4.14                                 | 2.80                                   | 2.79                    | 2.79                    | 2.82                    | 2.53                                  | 2.52               | 2.54               | 2.52               |

a. The distances are La-La distances between La<sub>1</sub> (La<sub>2</sub>, La<sub>3</sub>) and La<sub>2</sub> (La<sub>3</sub>, La<sub>1</sub>) atoms, together with their average values;

b. The distances are La-Pt bond lengths between La<sub>1</sub> (La<sub>2</sub>, La<sub>3</sub>) and Pt atoms, together with their average values;

c. The La<sub>1</sub>-C, La<sub>2</sub>-C, La<sub>3</sub>-C bond lengths are the distances between the three La atoms and their corresponding nearest C atoms in the cages. The La-C bond lengths are the average distances between the three La atoms and their nearest C atoms in the cages;

d. These La<sub>3</sub>N@C<sub>2n</sub> (2n=88, 92, 96) isomers were taken from the reference 33, 65, 66, in turn, and reoptimized at the level of B3LYP/6-31G(d).

\*. A rough comparison shows that the distance between La-N is significantly shorter than the distance between La-Pt, while the distance between La-C (La<sub>3</sub>N@C<sub>2n</sub>) is slightly farer than the distance between La-C (La<sub>3</sub>Pt@C<sub>2n</sub>).

**Table. S9** Relative energies and HOMO–LUMO gaps of different conformational isomers of La<sub>3</sub>Pt@C<sub>98</sub> at the B3LYP/6-31g(d)/SDD level.

| Rank | Isomeric spiral ID <sup>a</sup> | Caged IPR-code <sup>b</sup> | $\Delta E$ (in kcal/mol) <sup>c</sup> | Gap (in eV) <sup>d</sup> |
|------|---------------------------------|-----------------------------|---------------------------------------|--------------------------|
| 1    | 231010-1                        | 252                         | 0.00                                  | 0.95/1.50                |
| 2    | 231005-1                        | 247                         | 1.21                                  | 0.92/1.73                |
| 3    | 230926-1                        | 168                         | 3.09                                  | 1.11/1.28                |
| 4    | 230933-1                        | 175                         | 3.72                                  | 1.10/1.30                |
| 5    | 231005-2                        | 247                         | 4.96                                  | 0.89/1.81                |
| 6    | 230932-1                        | 174                         | 5.57                                  | 1.09/1.31                |
| 7    | 230979-1                        | 221                         | 5.58                                  | 1.19/1.24                |
| 8    | 230932-2                        | 174                         | 6.32                                  | 1.22/1.25                |
| 9    | 230933-2                        | 175                         | 6.68                                  | 1.11/1.33                |
| 10   | 230924-1                        | 166                         | 7.36                                  | 0.87/1.72                |
| 11   | 230924-2                        | 166                         | 8.49                                  | 0.40/1.58                |
| 12   | 231004-1                        | 246                         | 8.67                                  | 1.02/1.68                |
| 13   | 230979-2                        | 221                         | 8.70                                  | 1.25/1.33                |
| 14   | 230932-3                        | 174                         | 8.70                                  | 0.85/1.30                |
| 15   | 230839-1                        | 81                          | 8.72                                  | 1.07/1.85                |
| 16   | 230933-3                        | 175                         | 9.20                                  | 0.83/1.68                |
| 17   | 231005-3                        | 247                         | 9.65                                  | 0.83/1.68                |
| 18   | 231010-2                        | 252                         | 9.80                                  | 0.95/1.50                |
| 19   | 230924-3                        | 166                         | 10.37                                 | 1.07/1.65                |

|    |          |      |       |           |
|----|----------|------|-------|-----------|
| 20 | 230926-2 | 168  | 11.23 | 1.01/1.42 |
| 21 | 168785-1 | ---- | 12.59 | 1.12/2.09 |
| 22 | 230925-1 | 167  | 12.61 | 1.17/1.23 |
| 23 | 230922-1 | 164  | 12.64 | 1.10/1.23 |
| 24 | 230919-1 | 161  | 17.68 | 0.97/1.56 |

- a. Isomeric spiral ID is specific to each conformational isomer.
- b. Caged IPR-code is the IPR number specific to the cage of these  $\text{La}_3\text{Pt}@C_{98}$  isomers. Different conformational isomers can share a common cage;
- c. The relative energy of each isomer with respect to that of the isomer 231010-1. Calculations were performed at the UB3LYP/6-31g(d)/SDD level. The order of energy ranking is shown in the first column, where the non-dominant conformational isomers are marked in red;
- d. HOMO-LUMO gap for  $\alpha$  and  $\beta$  spin orbitals of  $\text{La}_3\text{Pt}@C_{98}$  isomers at the UB3LYP/6-31g(d)/SDD level.

**Table. S10** La-La distances (in Å) and La-Pt bond lengths (in Å), La-Pt-La bond angles (in degree) of the metal cluster La<sub>3</sub>Pt in these conformational isomers of La<sub>3</sub>Pt@C<sub>98</sub> at the B3LYP/6-31g(d)/SDD level.

| Isomeric<br>spiral ID | La-La distances (in Å) <sup>a</sup> |                                  |                                  |                                  | La-Pt bond lengths (in Å) <sup>b</sup> |                     |                     |                     | La-Pt-La bond angles (in degree) <sup>c</sup> |                                         |                                         |                                         |
|-----------------------|-------------------------------------|----------------------------------|----------------------------------|----------------------------------|----------------------------------------|---------------------|---------------------|---------------------|-----------------------------------------------|-----------------------------------------|-----------------------------------------|-----------------------------------------|
|                       | La-La                               | La <sub>1</sub> -La <sub>2</sub> | La <sub>2</sub> -La <sub>3</sub> | La <sub>3</sub> -La <sub>1</sub> | La-Pt                                  | La <sub>1</sub> -Pt | La <sub>2</sub> -Pt | La <sub>3</sub> -Pt | La-Pt-La                                      | La <sub>1</sub> -Pt-<br>La <sub>2</sub> | La <sub>2</sub> -Pt-<br>La <sub>3</sub> | La <sub>3</sub> -Pt-<br>La <sub>1</sub> |
| 231005-2              | 4.23                                | 4.44                             | 4.12                             | 4.13                             | 2.80                                   | 2.79                | 2.85                | 2.77                | 98.1                                          | 104.0                                   | 94.3                                    | 96.0                                    |
| 230932-2              | 4.21                                | 4.19                             | 4.29                             | 4.15                             | 2.82                                   | 2.82                | 2.83                | 2.80                | 96.7                                          | 95.9                                    | 99.3                                    | 95.2                                    |
| 230933-2              | 4.25                                | 4.29                             | 4.43                             | 4.03                             | 2.81                                   | 2.81                | 2.82                | 2.81                | 98.4                                          | 99.4                                    | 104.0                                   | 91.7                                    |
| 230924-2              | 4.17                                | 3.61                             | 4.78                             | 4.12                             | 2.79                                   | 2.83                | 2.82                | 2.72                | 98.2                                          | 79.4                                    | 119.2                                   | 96.1                                    |
| 230979-2              | 4.16                                | 3.92                             | 4.27                             | 4.30                             | 2.80                                   | 2.79                | 2.83                | 2.79                | 96.1                                          | 88.4                                    | 98.9                                    | 101.1                                   |
| 230932-3              | 4.17                                | 4.27                             | 4.31                             | 3.92                             | 2.80                                   | 2.83                | 2.79                | 2.79                | 95.8                                          | 98.8                                    | 100.2                                   | 88.5                                    |
| 230933-3              | 4.24                                | 4.53                             | 4.01                             | 4.17                             | 2.81                                   | 2.80                | 2.77                | 2.86                | 98.4                                          | 109.0                                   | 91.0                                    | 95.1                                    |
| 231005-3              | 4.26                                | 4.59                             | 4.27                             | 3.92                             | 2.81                                   | 2.78                | 2.85                | 2.79                | 99.0                                          | 109.2                                   | 98.4                                    | 89.4                                    |
| 231010-2              | 4.23                                | 4.20                             | 4.11                             | 4.37                             | 2.81                                   | 2.82                | 2.84                | 2.76                | 97.8                                          | 95.9                                    | 94.4                                    | 103.2                                   |
| 230924-3              | 4.19                                | 4.19                             | 3.89                             | 4.49                             | 2.80                                   | 2.81                | 2.84                | 2.74                | 97.6                                          | 96.0                                    | 88.6                                    | 108.1                                   |
| 230926-2              | 4.26                                | 4.13                             | 4.40                             | 4.24                             | 2.80                                   | 2.82                | 2.78                | 2.79                | 99.4                                          | 95.4                                    | 104.6                                   | 98.2                                    |

- a. The distances are La-La distances between La<sub>1</sub> (La<sub>2</sub>, La<sub>3</sub>) and La<sub>2</sub> (La<sub>3</sub>, La<sub>1</sub>) atoms, together with their average values;  
b. The distances are La-Pt bond lengths between La<sub>1</sub> (La<sub>2</sub>, La<sub>3</sub>) and Pt atoms, together with their average values;  
c. The angles are La-Pt-La bond angles among La<sub>1</sub> (La<sub>2</sub>, La<sub>3</sub>), Pt and La<sub>2</sub> (La<sub>3</sub>, La<sub>1</sub>) atoms, together with their average values.



**Table. S11** La-C, Pt-C bond lengths (in Å), and the coordinated environment of three La atoms in the cages of these conformational isomers of La<sub>3</sub>Pt@C<sub>98</sub> at the B3LYP/6-31g(d)/SDD level.

| Isomeric spiral ID | La-C (Carbon Cage) (in Å) <sup>a</sup> |                    |                    |                    | Pt-C (in Å) | Coordinated Environment <sup>b</sup> |                 |                 |
|--------------------|----------------------------------------|--------------------|--------------------|--------------------|-------------|--------------------------------------|-----------------|-----------------|
|                    | La-C                                   | La <sub>1</sub> -C | La <sub>2</sub> -C | La <sub>3</sub> -C |             | La <sub>1</sub>                      | La <sub>2</sub> | La <sub>3</sub> |
| 231005-2           | 2.53                                   | 2.57               | 2.51               | 2.50               | 3.03        | hexagon                              | acenaphthylene  | acenaphthylene  |
| 230932-2           | 2.53                                   | 2.51               | 2.55               | 2.54               | 3.27        | naphthalene                          | hexagon         | pentagon        |
| 230933-2           | 2.53                                   | 2.53               | 2.53               | 2.52               | 3.05        | naphthalene                          | naphthalene     | acenaphthylene  |
| 230924-2           | 2.56                                   | 2.58               | 2.54               | 2.56               | 3.04        | pentagon                             | naphthalene     | naphthalene     |
| 230979-2           | 2.52                                   | 2.52               | 2.50               | 2.55               | 3.02        | acenaphthylene                       | naphthalene     | hexagon         |
| 230932-3           | 2.52                                   | 2.51               | 2.54               | 2.52               | 3.03        | naphthalene                          | naphthalene     | naphthalene     |
| 230933-3           | 2.51                                   | 2.54               | 2.51               | 2.49               | 3.35        | naphthalene                          | naphthalene     | acenaphthylene  |
| 231005-3           | 2.52                                   | 2.52               | 2.53               | 2.52               | 3.06        | acenaphthylene                       | naphthalene     | pentagon        |
| 231010-2           | 2.53                                   | 2.52               | 2.55               | 2.51               | 3.04        | acenaphthylene                       | hexagon         | acenaphthylene  |
| 230924-3           | 2.52                                   | 2.56               | 2.50               | 2.50               | 2.94        | hexagon                              | acenaphthylene  | acenaphthylene  |
| 230926-2           | 2.52                                   | 2.52               | 2.52               | 2.51               | 3.11        | naphthalene                          | acenaphthylene  | naphthalene     |

a. The La<sub>1</sub>-C, La<sub>2</sub>-C, La<sub>3</sub>-C bond lengths are the distances between the three La atoms and their nearest C atoms in the cages, and the La-C bond lengths are the average distances of three values.

b. The coordinated environment of La atoms has a series of types: pentagon; hexagon; naphthalene; acenaphthylene. (See footnote to **Table. S6** for descriptions)

**Table. S12** Mulliken charge distributions of the top 10 La<sub>3</sub>Pt@C<sub>98</sub> isomers

| Spiral ID | Mulliken Charge Distribution |                 |                 |       |                          |
|-----------|------------------------------|-----------------|-----------------|-------|--------------------------|
|           | La <sub>1</sub>              | La <sub>2</sub> | La <sub>3</sub> | Pt    | Carbon Cage <sup>a</sup> |
| 231010    | 0.49                         | 0.52            | 0.50            | -0.24 | -1.27                    |
| 231005    | 0.53                         | 0.51            | 0.51            | -0.29 | -1.26                    |
| 230926    | 0.48                         | 0.49            | 0.52            | -0.22 | -1.26                    |
| 230933    | 0.52                         | 0.49            | 0.51            | -0.24 | -1.28                    |
| 230932    | 0.51                         | 0.48            | 0.48            | -0.18 | -1.29                    |
| 230979    | 0.48                         | 0.48            | 0.51            | -0.18 | -1.29                    |
| 230924    | 0.53                         | 0.50            | 0.51            | -0.45 | -1.09                    |
| 231004    | 0.49                         | 0.50            | 0.52            | -0.23 | -1.28                    |
| 230839    | 0.51                         | 0.47            | 0.47            | -0.19 | -1.26                    |
| 168785    | 0.44                         | 0.41            | 0.34            | -0.18 | -1.01                    |

a. The sum of Mulliken charges of all C atoms.

**Table. S13** Hirshfeld charge distributions of the top 10 La<sub>3</sub>Pt@C<sub>98</sub> isomers

| Spiral ID | Hirshfeld Charge Distribution |                 |                 |       |                          |
|-----------|-------------------------------|-----------------|-----------------|-------|--------------------------|
|           | La <sub>1</sub>               | La <sub>2</sub> | La <sub>3</sub> | Pt    | Carbon Cage <sup>a</sup> |
| 231010    | 0.45                          | 0.48            | 0.47            | -0.16 | -1.24                    |
| 231005    | 0.44                          | 0.46            | 0.49            | -0.16 | -1.23                    |
| 230926    | 0.46                          | 0.46            | 0.47            | -0.16 | -1.23                    |
| 230933    | 0.48                          | 0.47            | 0.46            | -0.16 | -1.25                    |
| 230932    | 0.47                          | 0.47            | 0.47            | -0.16 | -1.25                    |
| 230979    | 0.48                          | 0.47            | 0.47            | -0.15 | -1.27                    |
| 230924    | 0.47                          | 0.37            | 0.35            | -0.15 | -1.04                    |
| 231004    | 0.46                          | 0.48            | 0.47            | -0.16 | -1.25                    |
| 230839    | 0.46                          | 0.48            | 0.48            | -0.16 | -1.24                    |
| 168785    | 0.38                          | 0.36            | 0.45            | -0.18 | -1.01                    |

a. The sum of Hirshfeld charges of all C atoms.

**Table. S14** Voronoi deformation density (VDD) charge distributions of the top 10 La<sub>3</sub>Pt@C<sub>98</sub> isomers

| Spiral ID | Voronoi Deformation Density (VDD) Charge Distribution |                 |                 |       |                          |
|-----------|-------------------------------------------------------|-----------------|-----------------|-------|--------------------------|
|           | La <sub>1</sub>                                       | La <sub>2</sub> | La <sub>3</sub> | Pt    | Carbon Cage <sup>a</sup> |
| 231010    | 0.31                                                  | 0.33            | 0.33            | -0.35 | -0.62                    |
| 231005    | 0.31                                                  | 0.31            | 0.34            | -0.36 | -0.60                    |
| 230926    | 0.32                                                  | 0.32            | 0.32            | -0.36 | -0.60                    |
| 230933    | 0.34                                                  | 0.33            | 0.32            | -0.35 | -0.64                    |
| 230932    | 0.33                                                  | 0.37            | 0.31            | -0.30 | -0.71                    |
| 230979    | 0.34                                                  | 0.33            | 0.33            | -0.35 | -0.65                    |
| 230924    | 0.32                                                  | 0.21            | 0.21            | -0.34 | -0.40                    |
| 231004    | 0.34                                                  | 0.32            | 0.30            | -0.34 | -0.60                    |
| 230839    | 0.31                                                  | 0.34            | 0.32            | -0.29 | -0.66                    |
| 168785    | 0.23                                                  | 0.21            | 0.30            | -0.37 | -0.37                    |

a. The sum of Voronoi deformation density (VDD) charges of all C atoms.

**Table. S15** Total Mayer Bond Orders between La (Pt) and C atoms coordinated to them in La<sub>3</sub>Pt@C<sub>98</sub> isomers.

| Spiral ID | Mayer Bond Order      |                       |                       |         |
|-----------|-----------------------|-----------------------|-----------------------|---------|
|           | La <sub>1</sub> -Cage | La <sub>2</sub> -Cage | La <sub>3</sub> -Cage | Pt-Cage |
| 231010    | 2.68                  | 2.52                  | 2.75                  | 0       |
| 231005    | 2.83                  | 2.72                  | 2.41                  | 0       |
| 230926    | 2.82                  | 2.57                  | 2.21                  | 0       |
| 230933    | 2.50                  | 2.78                  | 2.74                  | 0       |
| 230932    | 2.97                  | 2.53                  | 2.48                  | 0       |
| 230979    | 2.68                  | 2.64                  | 2.59                  | 0       |
| 230924    | 2.64                  | 2.44                  | 2.19                  | 0       |
| 231004    | 2.71                  | 2.74                  | 2.78                  | 0       |
| 230839    | 2.68                  | 2.56                  | 2.51                  | 0       |
| 168785    | 2.54                  | 3.10                  | 3.09                  | 0       |

## 4 Supplementary Data

Data S1 The XYZ coordinates of La<sub>3</sub>Pt@C2(231010)-C<sub>98</sub>-1

| Element | X           | Y           | Z           |
|---------|-------------|-------------|-------------|
| C       | -3.04222721 | 0.14700493  | 3.05921861  |
| C       | -1.87930044 | 0.90478389  | 3.48160302  |
| C       | -0.71693524 | 0.15577604  | 3.91333501  |
| C       | 0.49495217  | 0.86384289  | 4.08924248  |
| C       | 1.75628830  | 0.23245662  | 3.93668148  |
| C       | 2.70069374  | 1.23077004  | 3.49020389  |
| C       | 3.72892458  | 0.88318122  | 2.53477245  |
| C       | 4.04655389  | 1.81572941  | 1.46232618  |
| C       | 4.41006472  | 1.25785354  | 0.14712734  |
| C       | 4.09702475  | 2.03379870  | -1.01992830 |
| C       | 3.76234429  | 1.41424186  | -2.26541662 |
| C       | 2.67843884  | 2.17591973  | -2.85292043 |
| C       | 1.62824952  | 1.53072624  | -3.55045349 |
| C       | 0.27800746  | 2.00643262  | -3.44196554 |
| C       | -0.79342986 | 1.06744205  | -3.75590236 |
| C       | -2.11795598 | 1.43613836  | -3.40454018 |
| C       | -3.16029124 | 0.48893021  | -3.19374783 |
| C       | -4.15675356 | 1.09322136  | -2.30096963 |
| C       | -4.86707299 | 0.28269682  | -1.32275554 |
| C       | -4.97142074 | 0.83604963  | 0.02553181  |
| C       | -4.73069502 | -0.01385902 | 1.18762460  |
| C       | -3.99140501 | 0.73936263  | 2.16429898  |
| C       | -3.00446536 | -1.26761568 | 3.06568881  |
| C       | -3.74209288 | -2.05227285 | 2.09359303  |
| C       | -4.53865742 | -1.43096181 | 1.09434561  |
| C       | -4.53594512 | -1.99051930 | -0.22694031 |
| C       | -4.59237470 | -1.12680897 | -1.39611014 |
| C       | -3.67682913 | -1.71793819 | -2.37389335 |
| C       | -2.85423090 | -0.91376092 | -3.21460014 |
| C       | -1.52488111 | -1.35804240 | -3.57876261 |
| C       | -0.54890859 | -0.34187341 | -3.96426050 |
| C       | 0.80379513  | -0.74774680 | -4.10046313 |
| C       | 1.86826353  | 0.17246493  | -3.90898234 |
| C       | 3.03400263  | -0.56859188 | -3.48111254 |
| C       | 3.90399346  | 0.02009387  | -2.47399615 |
| C       | 4.39968341  | -0.79873091 | -1.39394735 |
| C       | 4.58211389  | -0.18201177 | -0.05639145 |
| C       | 4.43759901  | -1.01099215 | 1.09372990  |

---

|   |             |             |             |
|---|-------------|-------------|-------------|
| C | 3.93920053  | -0.49797394 | 2.32990598  |
| C | 3.04067205  | -1.50407105 | 2.88619406  |
| C | 1.86487230  | -1.14142954 | 3.56718189  |
| C | 0.66152567  | -1.93895246 | 3.42712899  |
| C | -0.61750295 | -1.29516672 | 3.72467981  |
| C | -1.79950666 | -1.97065358 | 3.36316883  |
| C | -1.77664376 | -3.18356003 | 2.60119968  |
| C | -2.97528023 | -3.22782130 | 1.80556500  |
| C | -2.93616964 | -3.76083707 | 0.48669151  |
| C | -3.70527937 | -3.10916105 | -0.52535594 |
| C | -3.16702054 | -2.93241981 | -1.85151949 |
| C | -1.88375286 | -3.43581526 | -2.22395718 |
| C | -1.04285157 | -2.68106313 | -3.13654628 |
| C | 0.37502114  | -3.03673412 | -3.23162542 |
| C | 1.27963743  | -2.07918968 | -3.84349552 |
| C | 2.69286490  | -1.97266232 | -3.51642797 |
| C | 3.27173099  | -2.83541557 | -2.52898714 |
| C | 4.10282199  | -2.23622571 | -1.48983394 |
| C | 3.82008260  | -2.96046997 | -0.28027689 |
| C | 3.98125356  | -2.37002903 | 0.97778768  |
| C | 3.05753207  | -2.64247788 | 2.03324590  |
| C | 1.90205593  | -3.45640398 | 1.83777654  |
| C | 0.69781240  | -3.14534004 | 2.59411766  |
| C | -0.55610395 | -3.74923979 | 2.16525214  |
| C | -0.60454938 | -4.48972472 | 0.93968789  |
| C | -1.74967678 | -4.40641570 | 0.07479254  |
| C | -1.26837282 | -4.31208280 | -1.28323997 |
| C | 0.13978597  | -4.49714977 | -1.26506584 |
| C | 0.97919785  | -3.95888319 | -2.27301463 |
| C | 2.39111852  | -3.81705022 | -1.90699834 |
| C | 2.75679909  | -3.88650915 | -0.49458797 |
| C | 1.80412078  | -4.14994442 | 0.55666165  |
| C | 0.54783751  | -4.61497020 | 0.12498239  |
| C | -2.40593460 | 2.61912511  | -2.66938571 |
| C | -3.63937114 | 2.41267836  | -1.95874897 |
| C | -3.75716385 | 2.95878182  | -0.63338138 |
| C | -4.39271109 | 2.13527350  | 0.35344574  |
| C | -3.79767998 | 2.05541687  | 1.66750660  |
| C | -2.68824173 | 2.85118293  | 2.09533163  |
| C | -1.72145738 | 2.30506925  | 3.03164992  |
| C | -0.43029821 | 2.97312333  | 3.14303727  |
| C | 0.63815104  | 2.25846032  | 3.77061865  |
| C | 2.03565663  | 2.50003806  | 3.48329945  |
| C | 2.43042151  | 3.50566330  | 2.54282961  |

|    |             |             |             |
|----|-------------|-------------|-------------|
| C  | 3.43876559  | 3.15371857  | 1.54379006  |
| C  | 3.03035312  | 3.81376484  | 0.32447315  |
| C  | 3.34276598  | 3.24473299  | -0.92439961 |
| C  | 2.39939827  | 3.28005087  | -2.00646054 |
| C  | 1.07715707  | 3.78532644  | -1.83438094 |
| C  | 0.00132020  | 3.19179271  | -2.61463739 |
| C  | -1.35852586 | 3.48204855  | -2.22431412 |
| C  | -1.61635194 | 4.19854921  | -1.02234483 |
| C  | -2.74200495 | 3.84086267  | -0.18963707 |
| C  | -2.28063820 | 3.86362829  | 1.18220073  |
| C  | -0.96230372 | 4.39344644  | 1.20521489  |
| C  | -0.03682607 | 4.05046284  | 2.21807197  |
| C  | 1.37652968  | 4.27251463  | 1.90780989  |
| C  | 1.77174670  | 4.46464475  | 0.50397427  |
| C  | 0.79205850  | 4.46480904  | -0.56948249 |
| C  | -0.55150570 | 4.60768740  | -0.17903617 |
| Pt | -0.14619197 | -0.56403796 | 0.75185323  |
| La | 1.58970160  | -1.44187920 | -1.27841565 |
| La | -2.48777731 | 0.35955909  | -0.47339691 |
| La | 1.26429621  | 1.87147167  | 1.03721489  |

**Data S2** The XYZ coordinates of La<sub>3</sub>Pt@CI(231005)-C<sub>98</sub>-1

| Element | X           | Y           | Z           |
|---------|-------------|-------------|-------------|
| C       | -2.48446500 | -0.96040400 | 3.57570400  |
| C       | -2.04822000 | 0.39872700  | 3.71154000  |
| C       | -0.65308600 | 0.68504800  | 3.87427700  |
| C       | -0.14821400 | 2.01447500  | 3.51436300  |
| C       | 1.27276800  | 2.22352700  | 3.44923900  |
| C       | 1.77959100  | 3.29020800  | 2.64083200  |
| C       | 3.01796700  | 3.11160800  | 1.92914600  |
| C       | 2.88774100  | 3.77837800  | 0.65757400  |
| C       | 3.40129200  | 3.11676200  | -0.53794700 |
| C       | 2.58047400  | 3.12856200  | -1.74318500 |
| C       | 2.56011900  | 1.96095200  | -2.62239000 |
| C       | 1.35740000  | 1.62521300  | -3.40504200 |
| C       | 1.10672600  | 0.25313900  | -3.81217200 |
| C       | -0.26258700 | -0.25949500 | -3.95885200 |
| C       | -0.60710600 | -1.64167900 | -3.60708100 |
| C       | -1.95167300 | -1.94323600 | -3.09693300 |
| C       | -2.11861200 | -3.08737100 | -2.22269400 |



---

|   |             |             |             |
|---|-------------|-------------|-------------|
| C | -3.17623000 | -3.09217700 | -1.24540400 |
| C | -3.01254600 | -3.65499300 | 0.07920300  |
| C | -3.92264800 | -2.97759900 | 0.97267900  |
| C | -3.44128100 | -2.67820800 | 2.30499400  |
| C | -3.68851900 | -1.35149400 | 2.84988400  |
| C | -1.52652200 | -2.00551200 | 3.44902300  |
| C | -2.08127000 | -3.04990600 | 2.63759700  |
| C | -1.18341700 | -3.79912600 | 1.77470700  |
| C | -1.71502700 | -4.16083100 | 0.47591600  |
| C | -0.81590600 | -4.43109600 | -0.57508500 |
| C | -1.01875600 | -3.91121300 | -1.91383800 |
| C | 0.25576500  | -3.69228500 | -2.49732700 |
| C | 0.47678800  | -2.56272300 | -3.33202700 |
| C | 1.82391800  | -2.08724800 | -3.38553500 |
| C | 2.12082400  | -0.71049300 | -3.60123100 |
| C | 3.32775700  | -0.38836500 | -2.91488400 |
| C | 3.54356500  | 0.91088700  | -2.39022500 |
| C | 4.41271300  | 0.97382300  | -1.26394300 |
| C | 4.28984800  | 2.02811300  | -0.31804100 |
| C | 4.57651800  | 1.48960900  | 0.99054400  |
| C | 3.84310000  | 1.96239100  | 2.11284700  |
| C | 3.44383100  | 1.01635800  | 3.09108300  |
| C | 2.15963500  | 1.14505600  | 3.72123900  |
| C | 1.65084500  | -0.16774600 | 3.92721800  |
| C | 0.27359200  | -0.44068100 | 3.94926500  |
| C | -0.13188300 | -1.77860200 | 3.58071500  |
| C | 0.79215400  | -2.70996700 | 2.93622400  |
| C | 0.25303200  | -3.67857100 | 1.96775300  |
| C | 1.13954200  | -4.16719900 | 0.91916900  |
| C | 0.58248500  | -4.50679100 | -0.34324900 |
| C | 1.26354900  | -4.15932700 | -1.57404500 |
| C | 2.57554600  | -3.63656200 | -1.57338800 |
| C | 2.86265700  | -2.63184400 | -2.54629600 |
| C | 3.82004100  | -1.58890700 | -2.26565400 |
| C | 4.57763400  | -1.54624300 | -1.04500600 |
| C | 4.84996200  | -0.22696900 | -0.56712300 |
| C | 4.89132400  | 0.09430000  | 0.84345400  |
| C | 4.48509900  | -0.87679300 | 1.81456800  |
| C | 3.72951100  | -0.38465500 | 2.92605700  |
| C | 2.60183200  | -1.11872900 | 3.44472000  |
| C | 2.19584700  | -2.37377900 | 2.91233500  |
| C | 3.08813500  | -2.95705500 | 1.92720300  |
| C | 2.53947100  | -3.79758500 | 0.91234600  |
| C | 3.29243100  | -3.58763500 | -0.31240300 |

---

|    |             |             |             |
|----|-------------|-------------|-------------|
| C  | 4.33220600  | -2.59831100 | -0.04779100 |
| C  | 4.21960300  | -2.22888500 | 1.36544400  |
| C  | -4.13562700 | -2.05503900 | -1.16381900 |
| C  | -4.60831700 | -1.95622000 | 0.21507100  |
| C  | -4.92016900 | -0.64077400 | 0.76449400  |
| C  | -4.43058400 | -0.32787000 | 2.11705500  |
| C  | -4.06292800 | 1.02678200  | 2.38995100  |
| C  | -2.91007300 | 1.38702300  | 3.18812200  |
| C  | -2.38804000 | 2.62464300  | 2.69707400  |
| C  | -1.02293300 | 2.96945200  | 2.82444500  |
| C  | -0.50567600 | 4.00034800  | 1.91622800  |
| C  | 0.93310700  | 4.18822600  | 1.89546300  |
| C  | 1.67581300  | 4.54849800  | 0.68707300  |
| C  | 0.95556000  | 4.71998400  | -0.53535600 |
| C  | 1.42307000  | 4.00929300  | -1.72359900 |
| C  | 0.26608900  | 3.65731200  | -2.48417800 |
| C  | 0.22306900  | 2.52470600  | -3.35802400 |
| C  | -1.05976100 | 2.06801800  | -3.71364600 |
| C  | -1.29948100 | 0.68639500  | -3.98864300 |
| C  | -2.64398100 | 0.36249300  | -3.58458200 |
| C  | -2.97206100 | -0.90320600 | -3.05204900 |
| C  | -4.06201400 | -0.94262400 | -2.06218200 |
| C  | -4.65484500 | 0.25841100  | -1.59969400 |
| C  | -5.02331300 | 0.42109700  | -0.18647000 |
| C  | -4.71550300 | 1.77425800  | 0.15367000  |
| C  | -4.22326100 | 2.07596300  | 1.42112800  |
| C  | -3.18900000 | 3.05385300  | 1.58689100  |
| C  | -2.58440300 | 3.73345400  | 0.48231500  |
| C  | -1.27637900 | 4.31826900  | 0.68871900  |
| C  | -0.49021400 | 4.65208400  | -0.51162000 |
| C  | -0.90288900 | 4.09264300  | -1.76930600 |
| C  | -2.17782100 | 3.49837000  | -1.99183200 |
| C  | -2.25865600 | 2.59667000  | -3.08126300 |
| C  | -3.24025100 | 1.56575300  | -3.08752200 |
| C  | -4.20302100 | 1.52262200  | -2.07948400 |
| C  | -4.15783200 | 2.45973600  | -0.98852400 |
| C  | -3.09054300 | 3.38914800  | -0.86438600 |
| Pt | -0.14249300 | -0.18444800 | -0.95200700 |
| La | 0.53725300  | 2.32921900  | 0.10640800  |
| La | -2.18588400 | -1.13286300 | 0.73413900  |
| La | 2.20846300  | -1.25538600 | 0.07045200  |

---

---

**Data S3** The XYZ coordinates of La<sub>3</sub>Pt@CI(230926)-C<sub>98</sub>-1

---

| Element | X           | Y           | Z           |
|---------|-------------|-------------|-------------|
| C       | -2.84089800 | -0.08766800 | 3.27279200  |
| C       | -1.68035400 | 0.72521200  | 3.57578500  |
| C       | -0.44278000 | 0.04123800  | 3.93610500  |
| C       | 0.71692400  | 0.81812200  | 4.03461500  |
| C       | 2.01497100  | 0.25147400  | 3.88960100  |
| C       | 2.89247400  | 1.28925500  | 3.41137700  |
| C       | 3.95357100  | 0.97440900  | 2.52866600  |
| C       | 4.27131100  | 1.90248500  | 1.51035900  |
| C       | 4.62760900  | 1.41343900  | 0.18321200  |
| C       | 4.04774800  | 2.31544500  | -0.76949900 |
| C       | 3.46082900  | 1.84810300  | -1.98530600 |
| C       | 2.28858900  | 2.56004900  | -2.50612500 |
| C       | 1.30813500  | 1.88273200  | -3.32846000 |
| C       | -0.11112700 | 2.26488800  | -3.30044800 |
| C       | -1.11201900 | 1.23826200  | -3.60464900 |
| C       | -2.45277000 | 1.47697200  | -3.23619300 |
| C       | -3.35289100 | 0.40566200  | -2.93017000 |
| C       | -4.27781400 | 0.87955500  | -1.92360000 |
| C       | -4.79200300 | 0.00717000  | -0.91595700 |
| C       | -4.91954300 | 0.50342600  | 0.41671600  |
| C       | -4.63382100 | -0.36479800 | 1.54321900  |
| C       | -3.89575400 | 0.45048800  | 2.50013300  |
| C       | -2.72450800 | -1.52254000 | 3.24142800  |
| C       | -3.53295700 | -2.38495500 | 2.37684800  |
| C       | -4.45979900 | -1.78089300 | 1.42911000  |
| C       | -4.45471200 | -2.31183000 | 0.06999900  |
| C       | -4.51521300 | -1.38852400 | -1.05169600 |
| C       | -3.61735500 | -1.84337300 | -2.07678400 |
| C       | -2.93039700 | -0.94708800 | -2.96481300 |
| C       | -1.59772600 | -1.27478400 | -3.41620000 |
| C       | -0.72743800 | -0.16149100 | -3.81814800 |
| C       | 0.63810100  | -0.42247900 | -4.00224600 |
| C       | 1.64415000  | 0.58539200  | -3.76536800 |
| C       | 2.83964900  | -0.08727100 | -3.33763800 |
| C       | 3.70705600  | 0.46569300  | -2.34617200 |
| C       | 4.44739300  | -0.43784500 | -1.43352500 |
| C       | 4.83768100  | 0.04173500  | -0.11255900 |
| C       | 4.79061500  | -0.88750600 | 1.03040900  |
| C       | 4.21632200  | -0.41066700 | 2.27021200  |
| C       | 3.37257900  | -1.44027800 | 2.80126300  |
| C       | 2.17747700  | -1.11198200 | 3.52768600  |

---

|   |             |             |             |
|---|-------------|-------------|-------------|
| C | 1.01884800  | -1.96090800 | 3.40539400  |
| C | -0.27363200 | -1.38541500 | 3.73018500  |
| C | -1.44458300 | -2.12429000 | 3.40586200  |
| C | -1.39704500 | -3.32964900 | 2.65366000  |
| C | -2.67163800 | -3.50129100 | 1.98859300  |
| C | -2.66504300 | -4.01757100 | 0.63144300  |
| C | -3.54199400 | -3.38207500 | -0.32031300 |
| C | -3.02127500 | -3.05476400 | -1.64120400 |
| C | -1.72719800 | -3.43615900 | -2.11203100 |
| C | -1.00030400 | -2.56235100 | -3.02822200 |
| C | 0.43151400  | -2.75822600 | -3.15829000 |
| C | 1.20691000  | -1.71091900 | -3.74084300 |
| C | 2.57586300  | -1.49355800 | -3.39489700 |
| C | 3.22798200  | -2.35150700 | -2.49977800 |
| C | 4.21332800  | -1.87182900 | -1.56570300 |
| C | 4.16536700  | -2.77781600 | -0.42247500 |
| C | 4.41654900  | -2.27655800 | 0.89339000  |
| C | 3.47122600  | -2.59986000 | 1.96166400  |
| C | 2.29612300  | -3.43587300 | 1.76696300  |
| C | 1.09373700  | -3.16643800 | 2.55051600  |
| C | -0.14422400 | -3.81955400 | 2.15860800  |
| C | -0.21540200 | -4.52449500 | 0.92856800  |
| C | -1.42691600 | -4.49255100 | 0.13237000  |
| C | -1.01054400 | -4.31440900 | -1.24945900 |
| C | 0.39999800  | -4.40511400 | -1.30540900 |
| C | 1.13241300  | -3.67902300 | -2.26832100 |
| C | 2.50864600  | -3.44212900 | -1.93821600 |
| C | 3.05711800  | -3.68096100 | -0.61437000 |
| C | 2.16488800  | -4.07625700 | 0.45838100  |
| C | 0.90000800  | -4.55619500 | 0.05179200  |
| C | -2.83296300 | 2.62279200  | -2.46193300 |
| C | -3.94524400 | 2.23544900  | -1.62021600 |
| C | -4.00874900 | 2.70281800  | -0.27976700 |
| C | -4.48859000 | 1.82725100  | 0.73308500  |
| C | -3.82709300 | 1.78447500  | 2.01642900  |
| C | -2.72583900 | 2.62331700  | 2.33319800  |
| C | -1.63298300 | 2.11962700  | 3.12749400  |
| C | -0.35657200 | 2.85649400  | 3.09208800  |
| C | 0.76621100  | 2.19323600  | 3.63102300  |
| C | 2.10552500  | 2.48177400  | 3.22628200  |
| C | 2.36915300  | 3.41406200  | 2.18507900  |
| C | 3.52256200  | 3.11527100  | 1.36497100  |
| C | 3.47409400  | 3.39454200  | -0.03302800 |
| C | 2.40066100  | 4.10796900  | -0.55508300 |

|    |             |             |             |
|----|-------------|-------------|-------------|
| C  | 1.84724500  | 3.73680000  | -1.82164900 |
| C  | 0.49627700  | 4.22432300  | -1.87282800 |
| C  | -0.52233600 | 3.47325500  | -2.58579900 |
| C  | -1.88899400 | 3.60379700  | -2.09459400 |
| C  | -2.11776700 | 4.26854200  | -0.80823800 |
| C  | -3.06090400 | 3.68938200  | 0.11156400  |
| C  | -2.46678300 | 3.70683300  | 1.42273500  |
| C  | -1.22519700 | 4.42039300  | 1.36039400  |
| C  | -0.10451500 | 3.98791300  | 2.18903000  |
| C  | 1.25355100  | 4.19945600  | 1.66254300  |
| C  | 1.37731500  | 4.68048800  | 0.27543600  |
| C  | 0.24105600  | 4.90036600  | -0.59421100 |
| C  | -1.06052300 | 4.84775900  | -0.03134400 |
| Pt | -0.09678700 | -0.16341500 | -0.95944000 |
| La | -0.15662600 | 2.46753300  | -0.01274000 |
| La | -2.06353100 | -1.38392500 | 0.52979200  |
| La | 2.29885300  | -1.12376300 | 0.14802400  |

**Data S4** The XYZ coordinates of  $\text{La}_3\text{Pt}@CI(230933)\text{-C}_{98}$  (-1)

| Element | X           | Y           | Z           |
|---------|-------------|-------------|-------------|
| C       | 4.83091000  | 0.36971300  | 0.71472200  |
| C       | 4.44617300  | -0.41671700 | 1.82885100  |
| C       | 3.60451900  | 0.12527200  | 2.88711100  |
| C       | 2.83618400  | -0.94560200 | 3.42527600  |
| C       | 1.48884300  | -0.75059600 | 3.84127100  |
| C       | 0.54366400  | -1.86211100 | 3.70568000  |
| C       | -0.87588100 | -1.62209700 | 3.64865900  |
| C       | -1.77532900 | -2.46934100 | 2.85783100  |
| C       | -3.03294400 | -1.87788400 | 2.38008800  |
| C       | -3.65071800 | -2.47420100 | 1.25639800  |
| C       | -4.43082700 | -1.70793900 | 0.33273300  |
| C       | -4.19739400 | -2.25568700 | -0.98924000 |
| C       | -4.07916200 | -1.38694900 | -2.11987800 |
| C       | -3.10081800 | -1.68791800 | -3.10624300 |
| C       | -2.32657800 | -0.63667000 | -3.72443800 |
| C       | -1.01463000 | -1.15013800 | -3.96125500 |
| C       | 0.12434000  | -0.32485800 | -3.94954400 |
| C       | 1.40754600  | -0.92427400 | -3.58230200 |
| C       | 2.52241400  | -0.02941400 | -3.34603700 |

---

|   |             |             |             |
|---|-------------|-------------|-------------|
| C | 3.61480700  | -0.46253700 | -2.55499600 |
| C | 4.40864400  | 0.45390200  | -1.74853800 |
| C | 4.79748200  | -0.27758800 | -0.56246100 |
| C | 4.56723600  | 1.79579700  | 0.75812300  |
| C | 4.30917100  | 2.57215000  | -0.45475100 |
| C | 4.17782700  | 1.87658800  | -1.74808600 |
| C | 3.11542000  | 2.30506300  | -2.61799100 |
| C | 2.33780000  | 1.37760000  | -3.42731900 |
| C | 1.03445900  | 1.92895900  | -3.61120900 |
| C | -0.10726300 | 1.11798500  | -3.81172300 |
| C | -1.40613800 | 1.64696700  | -3.41519100 |
| C | -2.53294500 | 0.72983000  | -3.39970100 |
| C | -3.66415300 | 1.02098500  | -2.58861600 |
| C | -4.39952400 | -0.01866800 | -1.92153200 |
| C | -4.81444200 | 0.48482500  | -0.63942200 |
| C | -4.69891600 | -0.33210700 | 0.54451000  |
| C | -4.30279400 | 0.27979700  | 1.81059900  |
| C | -3.42284800 | -0.49583500 | 2.68997300  |
| C | -2.56897100 | 0.21813700  | 3.58563500  |
| C | -1.30257400 | -0.31849300 | 3.98280000  |
| C | -0.37574200 | 0.77018400  | 4.09052900  |
| C | 1.00535500  | 0.60740300  | 3.87771800  |
| C | 1.75963700  | 1.72090300  | 3.30068000  |
| C | 3.09457200  | 1.44800100  | 2.80981400  |
| C | 3.68879100  | 2.29796300  | 1.80483400  |
| C | 2.94791700  | 3.39741300  | 1.28638800  |
| C | 3.32145700  | 3.58334400  | -0.10039200 |
| C | 2.30860700  | 4.04451100  | -1.02339700 |
| C | 2.23987300  | 3.41025100  | -2.29866100 |
| C | 0.96379100  | 3.17507800  | -2.92470900 |
| C | -0.26306600 | 3.63718900  | -2.37614800 |
| C | -1.47565200 | 2.88824900  | -2.62444800 |
| C | -2.61196100 | 3.11538800  | -1.72872400 |
| C | -3.69409700 | 2.18549400  | -1.76274300 |
| C | -4.47903600 | 1.87566200  | -0.59788200 |
| C | -4.27145500 | 2.54237500  | 0.63367800  |
| C | -4.23885300 | 1.76368300  | 1.86637200  |
| C | -3.26501700 | 2.43235900  | 2.70861500  |
| C | -2.43803900 | 1.65022900  | 3.54584200  |
| C | -1.05881000 | 1.97747300  | 3.75582400  |
| C | -0.40113300 | 3.02711100  | 3.04228100  |
| C | 1.04010800  | 2.91036600  | 2.82655800  |
| C | 1.64675700  | 3.73592000  | 1.80318900  |
| C | 0.80282300  | 4.47606300  | 0.92500800  |

---

|    |             |             |             |
|----|-------------|-------------|-------------|
| C  | 1.09950100  | 4.54487100  | -0.48890500 |
| C  | -0.15451100 | 4.43925700  | -1.19760000 |
| C  | -1.20564500 | 4.48616100  | -0.24670900 |
| C  | -2.46573400 | 3.89690500  | -0.49986100 |
| C  | -3.27979200 | 3.58800200  | 0.67672800  |
| C  | -2.65415600 | 3.53217400  | 2.00329500  |
| C  | -1.23684700 | 3.83914400  | 2.16951100  |
| C  | -0.60628500 | 4.48454000  | 1.08040600  |
| C  | -3.03469400 | -3.55907500 | 0.54080200  |
| C  | -3.36346900 | -3.39666000 | -0.86239100 |
| C  | -2.38356000 | -3.69634000 | -1.85626500 |
| C  | -2.26817000 | -2.84386100 | -2.98436500 |
| C  | -0.96669100 | -2.50833000 | -3.51293000 |
| C  | 0.22656800  | -3.05683900 | -2.99975900 |
| C  | 1.44496800  | -2.27658900 | -3.02104200 |
| C  | 2.51587300  | -2.65945100 | -2.09584500 |
| C  | 3.57768600  | -1.73331600 | -1.90908100 |
| C  | 4.30848800  | -1.63405300 | -0.68728800 |
| C  | 3.97206100  | -2.44473000 | 0.42989400  |
| C  | 4.14374400  | -1.82407700 | 1.71261200  |
| C  | 3.23942200  | -2.14310600 | 2.76188000  |
| C  | 2.33004000  | -3.19001900 | 2.61008200  |
| C  | 1.01244500  | -3.09901200 | 3.15727700  |
| C  | 0.15786000  | -4.01303800 | 2.44403400  |
| C  | -1.24833700 | -3.68673000 | 2.23353200  |
| C  | -1.85733200 | -4.18595200 | 0.99770200  |
| C  | -0.99101000 | -4.76353400 | -0.04293400 |
| C  | -1.20406400 | -4.35962600 | -1.41718500 |
| C  | 0.07585500  | -4.09875200 | -2.01532300 |
| C  | 1.09777500  | -4.44216700 | -1.07140000 |
| C  | 2.32884800  | -3.66929200 | -1.05070200 |
| C  | 2.99895600  | -3.51407300 | 0.23805300  |
| C  | 2.29199400  | -3.99753300 | 1.42690000  |
| C  | 0.99403100  | -4.63174100 | 1.40327000  |
| C  | 0.42535400  | -4.93093400 | 0.13347300  |
| Pt | -0.19899500 | 0.02787800  | -0.94883900 |
| La | 2.24763100  | 1.15234000  | -0.20574800 |
| La | -2.00601000 | 1.33998300  | 0.72883900  |
| La | 0.23799400  | -2.42529100 | 0.36796500  |

---

---

**Data S5** The XYZ coordinates of La<sub>3</sub>Pt@C<sub>2</sub>(231010)-C<sub>98</sub>-2

---

| Element | X           | Y           | Z           |
|---------|-------------|-------------|-------------|
| C       | -3.26838200 | -0.93081300 | -2.62242400 |
| C       | -2.09735000 | -1.67340400 | -3.02962400 |
| C       | -1.03593900 | -0.95265400 | -3.73191800 |
| C       | 0.18574000  | -1.61213100 | -3.92081800 |
| C       | 1.41469000  | -0.89479600 | -4.01944300 |
| C       | 2.46396400  | -1.73388800 | -3.48383900 |
| C       | 3.52174700  | -1.17708400 | -2.70510000 |
| C       | 3.99331400  | -1.86373800 | -1.50799000 |
| C       | 4.48443300  | -1.07695100 | -0.37008800 |
| C       | 4.35730400  | -1.65181600 | 0.93173800  |
| C       | 4.10363400  | -0.83536200 | 2.08042900  |
| C       | 3.13215500  | -1.54396800 | 2.90115200  |
| C       | 2.11532300  | -0.84358900 | 3.57990700  |
| C       | 0.79959500  | -1.40863100 | 3.70187700  |
| C       | -0.30543200 | -0.48728600 | 3.95395900  |
| C       | -1.61647200 | -0.98429600 | 3.84165200  |
| C       | -2.71927900 | -0.13616400 | 3.53329400  |
| C       | -3.70086200 | -0.92636200 | 2.83461900  |
| C       | -4.49279000 | -0.35556300 | 1.79633300  |
| C       | -4.74528900 | -1.13882000 | 0.63675900  |
| C       | -4.76137600 | -0.49969600 | -0.66040000 |
| C       | -4.08710700 | -1.40806900 | -1.57242900 |
| C       | -3.33674400 | 0.48457700  | -2.85546300 |
| C       | -4.09626600 | 1.40702100  | -2.02180700 |
| C       | -4.77505800 | 0.91884000  | -0.84128300 |
| C       | -4.68637500 | 1.74498600  | 0.36264800  |
| C       | -4.42788000 | 1.07171900  | 1.62034800  |
| C       | -3.47568400 | 1.84836100  | 2.36478100  |
| C       | -2.52363100 | 1.24536500  | 3.25795100  |
| C       | -1.21585100 | 1.82171500  | 3.40708600  |
| C       | -0.14014000 | 0.95020000  | 3.86647800  |
| C       | 1.18431400  | 1.44260200  | 3.78232400  |
| C       | 2.29725200  | 0.57173700  | 3.66839900  |
| C       | 3.37232700  | 1.29247800  | 3.01219100  |
| C       | 4.19501400  | 0.57745000  | 2.03748300  |
| C       | 4.52875200  | 1.21962000  | 0.77330800  |
| C       | 4.58550600  | 0.38112500  | -0.44506100 |
| C       | 4.26587900  | 0.97503300  | -1.71042800 |
| C       | 3.67125700  | 0.22597100  | -2.76923700 |
| C       | 2.66620600  | 1.06091300  | -3.39622800 |
| C       | 1.45933100  | 0.51794300  | -3.89592400 |



---

|   |             |             |             |
|---|-------------|-------------|-------------|
| C | 0.21796700  | 1.26823000  | -3.76349300 |
| C | -1.02028200 | 0.51380000  | -3.78765200 |
| C | -2.20795100 | 1.17615100  | -3.37641400 |
| C | -2.21410300 | 2.50795300  | -2.87537600 |
| C | -3.38601300 | 2.67810700  | -2.02715700 |
| C | -3.28020100 | 3.49422400  | -0.83007000 |
| C | -3.92627800 | 2.99576800  | 0.37352400  |
| C | -3.16372100 | 3.01995100  | 1.62533300  |
| C | -1.86546300 | 3.62410400  | 1.76923700  |
| C | -0.88270600 | 3.06475500  | 2.68944800  |
| C | 0.50612700  | 3.49288200  | 2.56103500  |
| C | 1.53265900  | 2.72329400  | 3.23907500  |
| C | 2.91954200  | 2.65323500  | 2.81919500  |
| C | 3.33424000  | 3.35353700  | 1.63568000  |
| C | 4.13421100  | 2.64048000  | 0.63981000  |
| C | 3.65933800  | 3.10572700  | -0.64372800 |
| C | 3.72201500  | 2.30165400  | -1.78506300 |
| C | 2.68937200  | 2.33998100  | -2.77417900 |
| C | 1.50183300  | 3.11387800  | -2.60151100 |
| C | 0.25170300  | 2.61475000  | -3.16691600 |
| C | -0.98541500 | 3.21309100  | -2.70665300 |
| C | -0.97604900 | 4.16472600  | -1.64274100 |
| C | -2.04658800 | 4.17548700  | -0.65869100 |
| C | -1.40700700 | 4.35621700  | 0.63990800  |
| C | -0.02688600 | 4.60389400  | 0.43327200  |
| C | 0.94246500  | 4.26156500  | 1.41375300  |
| C | 2.31573600  | 4.12450600  | 0.94006700  |
| C | 2.54395700  | 3.98009000  | -0.48583900 |
| C | 1.47897400  | 4.01589900  | -1.46353000 |
| C | 0.23506000  | 4.48981200  | -0.98812900 |
| C | -1.88991500 | -2.30424100 | 3.36499100  |
| C | -3.17653900 | -2.25903300 | 2.71527000  |
| C | -3.39342800 | -3.02197100 | 1.54011300  |
| C | -4.17332700 | -2.44963500 | 0.49856700  |
| C | -3.75255200 | -2.60294100 | -0.87256000 |
| C | -2.62979100 | -3.38520200 | -1.25059600 |
| C | -1.79130300 | -2.94612000 | -2.35041400 |
| C | -0.46367000 | -3.54607500 | -2.47947000 |
| C | 0.45961100  | -2.90721200 | -3.34141600 |
| C | 1.87103200  | -2.98073000 | -3.13084600 |
| C | 2.38840700  | -3.70887000 | -2.05506200 |
| C | 3.46473200  | -3.17346800 | -1.26992200 |
| C | 3.27070500  | -3.66879700 | 0.06249600  |
| C | 3.69029100  | -2.90201500 | 1.13965500  |

|    |             |             |             |
|----|-------------|-------------|-------------|
| C  | 2.86094300  | -2.80791900 | 2.30911300  |
| C  | 1.58095500  | -3.44245100 | 2.39142700  |
| C  | 0.53171400  | -2.75889100 | 3.15349600  |
| C  | -0.84582000 | -3.19885000 | 2.99541500  |
| C  | -1.17334800 | -4.17123100 | 1.96258300  |
| C  | -2.36956600 | -3.95612400 | 1.17427400  |
| C  | -2.05439100 | -4.22334200 | -0.20853900 |
| C  | -0.72555700 | -4.74629400 | -0.27313800 |
| C  | 0.08776700  | -4.42647200 | -1.42615500 |
| C  | 1.49306900  | -4.43396200 | -1.21245300 |
| C  | 2.06441400  | -4.42935200 | 0.14896300  |
| C  | 1.22573500  | -4.39167300 | 1.30902300  |
| C  | -0.16293000 | -4.73536100 | 1.09920200  |
| Pt | 0.25457900  | 0.03444200  | -0.98117400 |
| La | 1.83158600  | 1.50492700  | 0.82859300  |
| La | -2.22037200 | 1.19204700  | -0.22083800 |
| La | -0.19891100 | -2.33485200 | 0.35791300  |

**Data S6** The XYZ coordinates of La<sub>3</sub>Pt@CI(231005)-C<sub>98</sub>-2

| Element | X           | Y           | Z           |
|---------|-------------|-------------|-------------|
| C       | -2.38683500 | 1.52316900  | -3.33272700 |
| C       | -2.07485300 | 0.15522200  | -3.63846100 |
| C       | -0.70120600 | -0.22347900 | -3.87572300 |
| C       | -0.30285600 | -1.61344600 | -3.66052100 |
| C       | 1.10897400  | -1.95177200 | -3.63968800 |
| C       | 1.53507300  | -3.12441400 | -2.95335300 |
| C       | 2.79229500  | -3.14065500 | -2.24379500 |
| C       | 2.60028700  | -3.87765000 | -1.02077200 |
| C       | 3.14805900  | -3.41195400 | 0.22170500  |
| C       | 2.33771000  | -3.48323300 | 1.43494100  |
| C       | 2.44383500  | -2.43546000 | 2.43303000  |
| C       | 1.24974400  | -2.11561000 | 3.25227300  |
| C       | 1.10617300  | -0.74351900 | 3.74924300  |
| C       | -0.18669100 | -0.13878500 | 3.97461000  |
| C       | -0.41828300 | 1.29372400  | 3.78512600  |
| C       | -1.73461300 | 1.75738100  | 3.33678700  |
| C       | -1.82255900 | 3.01314600  | 2.61687000  |
| C       | -2.89825200 | 3.22960600  | 1.68765600  |
| C       | -2.70331500 | 3.92729400  | 0.41959700  |
| C       | -3.66523900 | 3.40171500  | -0.52133000 |

---

|   |             |             |             |
|---|-------------|-------------|-------------|
| C | -3.19351200 | 3.16898400  | -1.87306000 |
| C | -3.52684600 | 1.92026400  | -2.52562400 |
| C | -1.35380600 | 2.47709200  | -3.13898700 |
| C | -1.80934000 | 3.46671000  | -2.20114600 |
| C | -0.85697700 | 4.05338300  | -1.29117200 |
| C | -1.35623000 | 4.33974200  | 0.05021400  |
| C | -0.42097500 | 4.41429700  | 1.10414900  |
| C | -0.65568400 | 3.77673300  | 2.38809900  |
| C | 0.59482800  | 3.38741100  | 2.91806300  |
| C | 0.72714400  | 2.14774800  | 3.59934400  |
| C | 2.03452100  | 1.56395400  | 3.57078700  |
| C | 2.20197900  | 0.15212600  | 3.61189700  |
| C | 3.41673500  | -0.18694800 | 2.95696600  |
| C | 3.51321000  | -1.45833600 | 2.30197000  |
| C | 4.36263500  | -1.47425300 | 1.16434500  |
| C | 4.14599500  | -2.40511900 | 0.11639500  |
| C | 4.45130400  | -1.75035700 | -1.13568100 |
| C | 3.69301100  | -2.04767500 | -2.31036800 |
| C | 3.36032300  | -0.96900400 | -3.17850500 |
| C | 2.06973800  | -0.92266700 | -3.81012900 |
| C | 1.66877500  | 0.44791500  | -3.88966600 |
| C | 0.31521300  | 0.83392200  | -3.86500700 |
| C | 0.01696200  | 2.16069900  | -3.33562300 |
| C | 1.00715100  | 2.93563900  | -2.61138200 |
| C | 0.56457100  | 3.83472000  | -1.52909200 |
| C | 1.48963700  | 4.12821200  | -0.44252900 |
| C | 0.97728900  | 4.38583300  | 0.85728800  |
| C | 1.64125500  | 3.85251000  | 2.03064300  |
| C | 2.92969100  | 3.26069100  | 1.98923700  |
| C | 3.16785800  | 2.13682300  | 2.87075900  |
| C | 4.05491600  | 1.04024000  | 2.49236100  |
| C | 4.76471900  | 1.04469200  | 1.22157200  |
| C | 4.88484800  | -0.23437200 | 0.59105800  |
| C | 4.87787700  | -0.42104200 | -0.84878000 |
| C | 4.51479400  | 0.66484500  | -1.70796600 |
| C | 3.75194700  | 0.37529500  | -2.87053800 |
| C | 2.69306700  | 1.25950900  | -3.31327000 |
| C | 2.37436200  | 2.45280200  | -2.62164800 |
| C | 3.26781500  | 2.80977200  | -1.55525700 |
| C | 2.82956200  | 3.61412500  | -0.47061800 |
| C | 3.59740400  | 3.25293100  | 0.71096500  |
| C | 4.52323600  | 2.18309200  | 0.33481600  |
| C | 4.31499000  | 1.94201100  | -1.08630600 |
| C | -3.93612900 | 2.27615000  | 1.51585000  |

---

|    |             |             |             |
|----|-------------|-------------|-------------|
| C  | -4.42748000 | 2.36022700  | 0.14055900  |
| C  | -4.81468900 | 1.11946700  | -0.53204800 |
| C  | -4.35672200 | 0.90127200  | -1.90955600 |
| C  | -4.12851500 | -0.44048600 | -2.34961500 |
| C  | -3.00517600 | -0.80236900 | -3.19727500 |
| C  | -2.57697000 | -2.12068500 | -2.84788000 |
| C  | -1.24502200 | -2.53557200 | -3.02864000 |
| C  | -0.78492500 | -3.62948900 | -2.17611100 |
| C  | 0.60377500  | -3.92362200 | -2.21972500 |
| C  | 1.28792600  | -4.42006700 | -1.06504500 |
| C  | 0.57925200  | -4.67296000 | 0.11225400  |
| C  | 1.10935800  | -4.25790300 | 1.38163900  |
| C  | -0.00318900 | -4.08508900 | 2.28232400  |
| C  | 0.07076900  | -2.96974700 | 3.21513300  |
| C  | -1.18175400 | -2.37602100 | 3.54573300  |
| C  | -1.30142300 | -0.99629600 | 3.93064700  |
| C  | -2.60772800 | -0.53134700 | 3.61199900  |
| C  | -2.83713900 | 0.82062500  | 3.20730300  |
| C  | -3.93213000 | 1.06346900  | 2.28328900  |
| C  | -4.64028700 | -0.04444000 | 1.71446700  |
| C  | -4.99662700 | -0.02301200 | 0.30171100  |
| C  | -4.79337400 | -1.36201800 | -0.18891100 |
| C  | -4.35652600 | -1.55944000 | -1.49220400 |
| C  | -3.39470300 | -2.59724400 | -1.76666300 |
| C  | -2.85623300 | -3.42620100 | -0.74363000 |
| C  | -1.56620500 | -4.04698300 | -1.00060400 |
| C  | -0.85655800 | -4.62415300 | 0.14049600  |
| C  | -1.24932600 | -4.36709500 | 1.51828100  |
| C  | -2.46319200 | -3.61978600 | 1.76134600  |
| C  | -2.43882600 | -2.75456200 | 2.91472800  |
| C  | -3.30769700 | -1.62447000 | 3.01561200  |
| C  | -4.28205600 | -1.38529300 | 2.04320000  |
| C  | -4.31756800 | -2.21242000 | 0.86713600  |
| C  | -3.32408600 | -3.23306200 | 0.64363900  |
| Pt | 0.24891500  | -0.07394600 | -0.97580600 |
| La | 2.26728800  | 0.99406500  | 0.63371500  |
| La | -2.03840000 | 1.49745400  | -0.34868600 |
| La | -0.43501000 | -2.13302600 | 0.74255000  |

---

---

## 5 Supplementary References

- 77 M. J. Frisch, G. W. Trucks, H. B. Schlegel, G. E. Scuseria, M. A. Robb, J. R. Cheeseman and G. Scalmani, Gaussian09 (2009). Gaussian Inc, Wallingford, CT.
- 78 J. M. Campanera, C. Bo, M. M. Olmstead, A. L. Balch and J. M. Poblet, Bonding within the Endohedral Fullerenes Sc<sub>3</sub>N@C<sub>78</sub> and Sc<sub>3</sub>N@C<sub>80</sub> as Determined by Density Functional Calculations and Reexamination of the Crystal Structure of {Sc<sub>3</sub>N@C<sub>78</sub>}·Co(OEP)}·1.5(C<sub>6</sub>H<sub>6</sub>)·0.3(CHCl<sub>3</sub>), *The Journal of Physical Chemistry A*, 2002, **106**, 12356-12364.
- 79 G. Brinkmann, O. D. Friedrichs, S. Liskien, A. Peeters and N. Van Cleemput, CaGe - a Virtual Environment for Studying Some Special Classes of Plane Graphs - an Update, *Match-Commun Math Co*, 2010, **63**, 533-552.
- 80 T. Lu, gau\_xtb: A Gaussian interface for xtb code, [http://sobereva.com/soft/gau\\_xtb](http://sobereva.com/soft/gau_xtb) (accessed 4 1, 2022)).
- 81 P. C. Hariharan and J. A. Pople, The influence of polarization functions on molecular orbital hydrogenation energies, *Theoretica Chimica Acta*, 1973, **28**, 213-222.
- 82 W. J. Hehre, R. Ditchfield and J. A. Pople, Self—Consistent Molecular Orbital Methods. XII. Further Extensions of Gaussian—Type Basis Sets for Use in Molecular Orbital Studies of Organic Molecules, *The Journal of Chemical Physics*, 1972, **56**, 2257-2261.
- 83 C. E. White, J. L. Provis, T. Proffen, D. P. Riley and J. S. van Deventer, Combining density functional theory (DFT) and pair distribution function (PDF) analysis to solve the structure of metastable materials: the case of metakaolin, *Phys Chem Chem Phys*, 2010, **12**, 3239-3245.
- 84 Z. Slaninaj, Equilibrium isomeric mixtures: potential energy hypersurfaces as the origin of the overall thermodynamics and kinetics, *International Reviews in Physical Chemistry*, 1987, **6**, 251-267.
- 85 A. E. Reed, L. A. Curtiss and F. Weinhold, Intermolecular interactions from a natural bond orbital, donor-acceptor viewpoint, *Chemical Reviews*, 2002, **88**, 899-926.
- 86 W. Humphrey, A. Dalke and K. Schulten, VMD: Visual molecular dynamics, *Journal of Molecular Graphics*, 1996, **14**, 33-38.
